# Supplementary material for: Repressive H3K9me2 protects lifespan against the transgenerational burden of COMPASS activity in C. elegans
Source: eLife journal article supplement (doi:10.7554/elife.48498), 2019-12-09
Supplement: supp [file elife-48498-supp-v1.zip]

Archive with 13 entries (13 files):
- elife_poa_e48498_Figure_1_figure_supplement_3.pdf
- elife_poa_e48498_Supplementary_file_4.xlsx
- elife_poa_e48498_Figure_5_figure_supplement_1.pdf
- elife_poa_e48498_Supplementary_file_1.xlsx
- elife_poa_e48498_Figure_3_figure_supplement_1.pdf
- elife_poa_e48498_Figure_2_figure_supplement_1.pdf
- elife_poa_e48498_Figure_5_figure_supplement_2.pdf
- elife_poa_e48498_Figure_1_figure_supplement_1.pdf
- elife_poa_e48498_Supplementary_file_3.xlsx
- elife_poa_e48498_Transparent_Reporting_File.docx
- elife_poa_e48498_Figure_4_figure_supplement_1.pdf
- elife_poa_e48498_Supplementary_file_2.xlsx
- elife_poa_e48498_Figure_1_figure_supplement_2.pdf
