# Supplementary material for: Repressive H3K9me2 protects lifespan against the transgenerational burden of COMPASS activity in C. elegans
Source: eLife journal article supplement (doi:10.7554/elife.48498), 2019-12-09
Supplement: supp [file elife-48498-supp-v1.zip › elife_poa_e48498_Supplementary_file_1.xlsx]

## Sheet: Sheet1
Lee et al. - supplementary table 1
Generation	Genotype	Median lifespan (days)	N (dead/initial)	Comparision	P value	Significance	Figure	Replicate
F2	WT	17	84/90				1	2/8
F2	wdr-5	18	78/90	F2 WT	0.7561		1	2/8
F8	WT	16	88/90				1	2/8
F8	wdr-5	17	84/90	F8 WT	0.9103		1	2/8
F14	WT	19	87/90				1	2/8
F14	wdr-5	19	75/90	F14 WT	0.5639		1	2/8
F20	WT	17	75/90				1	2/8
F20	wdr-5	18	76/90	F20 WT	0.0653		1	2/8
F24	WT	17	84/90				1	2/8
F24	wdr-5	20	69/90	F24 WT	0.0037	**	1	2/8
F37	WT	21	87/90				1	2/8
F37	wdr-5	23	79/90	F37 WT	0.0007	***	1	2/8
F41	WT	18	74/90				1	2/8
F41	wdr-5	22	67/90	F41 WT	0.0137	*	1	2/8
F4	WT	16	70/90				2A, 2A'	1/3
F4	wdr-5	17	67/90	F4 WT	0.4337		2A, 2A''	1/3
				F20 WT	0.0198	*
F12	WT	14	83/90	F4 WT	0.0236	*	2A, 2A'	1/3
F12	wdr-5	15	84/90	F12 WT	0.0035	**	2A, 2A''	1/3
F20	WT	14	84/90	F4 WT	0.0088	**	2A, 2A'	1/3
F20	wdr-5	18	77/90	F20 WT	<0.0001	****	2A, 2A''	1/3
				F4 WT	0.0009	***
				F12 wdr-5	0.009	**
late	WT	18	56/60				4B	1/3
late	met-2	14	14/60	WT in this assay	0.0002	***	4B	1/3
F9	WT	18	65/90				4C	1/2
F2	wdr-5 met-2	18	65/90	F9 WT	0.8726		4C	1/2
F2	met-2	17	60/90	F9 WT	0.2166		4C	1/2
F16	WT	16	70/90				4C	1/1
F9	wdr-5 met-2	14	75/90	F16 WT	0.0003	***	4C	1/1
F9	met-2	15	76/90	F16 WT	0.0165	*	4C	1/1
F23	WT	18	70/90				4C	1/1
F17	wdr-5 met-2	16	67/90	F23 WT	0.0004	***	4C	1/1
F17	met-2	15	78/90	F23 WT	<0.0001	****	4C	1/1
F28	WT	16	71/90				4C	1/1
F22	wdr-5 met-2	15	69/90	F28 WT	0.0219	*	4C	1/1
F22	met-2	15	70/90	F28 WT	0.0053	**	4C	1/1
late	WT	17	53/60				4D	1/3
P0	jhdm-1	18	52/60	WT in P0 assay	0.004	**	4D	1/3
late	WT	18	49/60				4D	1/3
F6	jhdm-1	22	52/60	WT in F6 assay	0.0004	***	4D	1/3
late	WT	14	49/60				4D	1/3
F12	jhdm-1	19	50/60	WT in F12 assay	<0.0001	****	4D	1/3
late	WT	18	50/60				4D	1/3
F14	jhdm-1	20	54/60	WT in F14 assay	0.0004	***	4D	1/3
late	WT	17	57/60				4D	1/3
F18	jhdm-1	21	54/60	WT in F18 assay	0.0009	***	4D	1/3
late	WT	16	58/60				4D	1/3
F24	jhdm-1	21	53/60	WT in F24 assay	0.0009	***	4D	1/3
F4	WT	17	83/90				4F	1/1
F32	WT	15	73/90	F4 WT	0.1153		4F	1/1
F12	jhdm-1	21	86/90	F4 WT	<0.0001	****	4F	1/1
				F32 WT	<0.0001	****
mid	WT	18	45/60				5B	1/4
F3	WT (wdr-5)	21	27/60	WT in F3 assay	0.0446	*	5B	1/4
F3	wdr-5 (wdr-5)	22	30/60	WT in F3 assay	0.0138	*	5B	1/4
mid	WT	15	54/60				5C	1/4
F5	WT (wdr-5)	16	51/60	WT in F5 assay	0.47		5C	1/4
F5	wdr-5 (wdr-5)	19	47/60	WT in F5 assay	<0.0001	****	5C	1/4
early	WT	23	79/90				5E	1/2
F3	met-2 ("wdr-5")	19	62/90	WT in F3 assay	<0.0001	****	5E	1/2
F3	WT ("wdr-5")	24	62/90	WT in F3 assay	0.0395	*	5E	1/2
F18	WT	17	88/90				5F	1/4
F4	WT (jhdm-1)	20	85/90	WT in F4 assay	0.007	**	5F	1/4
F4	jhdm-1 (jhdm-1)	20	87/90	WT in F4 assay	0.0101	*	5F	1/4
F22	WT	17	83/90				5G	1/3
F7	WT (jhdm-1)	16	77/90	WT in F7 assay	0.447		5G	1/3
F7	jhdm-1 (jhdm-1)	20	82/90	WT in F7 assay	<0.0001	****	5G	1/3
