# Supplementary material for: Repressive H3K9me2 protects lifespan against the transgenerational burden of COMPASS activity in C. elegans
Source: eLife journal article supplement (doi:10.7554/elife.48498), 2019-12-09
Supplement: supp [file elife-48498-supp-v1.zip › elife_poa_e48498_Supplementary_file_2.xlsx]

## Sheet: Sheet1
Lee et al. - supplementary table 2
generation	genotype	% survival	SEM	avg embryos	SEM	total embryos	avg adults	SEM	total adults	broods	replicate
F2	WT	0.998107	0.0605951	346.6	15.2466	1733	345.8	14.4686	1729	5	1/2
	wdr-5	0.850573	0.158864	217.75	18.2683	871	187.75	31.3299	751	4
F8	WT	0.998957	0.0838408	287.4	17.6822	1437	286.8	16.3719	1434	5
	wdr-5	0.818967	0.083608	207.667	12.8625	623	170	13.7961	510	3
F14	WT	0.991778	0.112838	289.5	21.7006	1158	287.75	24.6285	1151	4
	wdr-5	0.839708	0.0768882	192	10.0598	960	161.6	12.1351	808	5
F20	WT	0.995397	0.0910451	287.4	19.0908	1437	285.8	17.9705	1429	5
	wdr-5	0.78587	0.0924286	151.6	11.0436	758	119.6	11.0436	598	5
F24	WT	0.998581	0.0799735	248.8	14.14	1244	248.4	14.0164	1242	5
	wdr-5	0.745945	0.233879	137.25	27.3416	549	107.5	26.0272	430	4
P0	WT	1.05124	0.0406015	241.2	6.04428	1457	253.6	7.45319	1513	6	2/2
	wdr-5	1.01131	0.0459273	236.667	7.61869	1420	239.167	7.66123	1435	6
F3	WT	0.994378	0.0543426	314.833	12.3327	1889	313	11.9276	1878	6
	wdr-5	0.86228	0.141458	233	26.3148	1398	201.667	23.9954	1210	6
F10	WT	1.00782	0.0317167	315.5	7.50444	1893	317.833	6.54939	1907	6
	wdr-5	0.835244	0.0743943	252	13.7768	1512	211	14.8369	1266	6
F18	WT	1.00521	0.0258772	309.4	5.70614	1547	311	5.5857	1555	5
	wdr-5	0.905336	0.12332	204.6	19.0121	1023	185.2	18.4456	926	5
F24	WT	0.995494	0.0910662	282.4	18.14	1412	281.2	18.315	1406	5
	wdr-5	0.772475	0.198465	197	30.839	985	162.2	33.043	811	5
F1	WT	---	---	---	---	---	270.8	18.3341	1354	5	1/1
	jhdm-1	---	---	---	---	---	184.2	29.5117	921	5
F6	WT	---	---	---	---	---	261.286	20.6164	1829	7
	jhdm-1	---	---	---	---	---	220.429	22.9905	1543	7
F12	WT	---	---	---	---	---	196	17.1464	784	5
	jhdm-1	---	---	---	---	---	188.6	24.9772	943	5
F18	WT	---	---	---	---	---	221.3	13.5	1549	7
	jhdm-1	---	---	---	---	---	202.8	20.2	1217	6
F24	WT	---	---	---	---	---	273	31.5	1639	6
	jhdm-1	---	---	---	---	---	265	9.3	1855	7
