# Supplementary material for: Repressive H3K9me2 protects lifespan against the transgenerational burden of COMPASS activity in C. elegans
Source: eLife journal article supplement (doi:10.7554/elife.48498), 2019-12-09
Supplement: supp [file elife-48498-supp-v1.zip › elife_poa_e48498_Supplementary_file_3.xlsx]

## Sheet: Sheet1
Lee et al. - supplementary table 3
Generation	Genotype	Median lifespan (days)	N (dead/initial)	Comparision	P value	Significance	Figure	Replicate
P0	WT	21	55/60				Fig 1 - Fig Supp 1A	1/8
P0	wdr-5	20	47/60	P0 WT	0.5687		Fig 1 - Fig Supp 1A	1/8
F3	WT	23	55/60				Fig 1 - Fig Supp 1A	1/8
F3	wdr-5	22	52/60	F3 WT	0.1296		Fig 1 - Fig Supp 1A	1/8
F6	N2	22	47/60				Fig 1 - Fig Supp 1A	1/8
F6	wdr-5	22	51/60	F6 WT	0.386		Fig 1 - Fig Supp 1A	1/8
F9	WT	21	52/60				Fig 1 - Fig Supp 1A	1/8
F9	wdr-5	23	50/60	F9 WT	0.0053	**	Fig 1 - Fig Supp 1A	1/8
F12	Wt	23	56/60				Fig 1 - Fig Supp 1A	1/8
F12	wdr-5	24	51/60	F12 WT	0.0112	*	Fig 1 - Fig Supp 1A	1/8
F15	WT	24	57/60				Fig 1 - Fig Supp 1A	1/8
F15	wdr-5	23	45/60	F15 WT	0.3758		Fig 1 - Fig Supp 1A	1/8
F18	WT	23	50/60				Fig 1 - Fig Supp 1A	1/8
F18	wdr-5	25	51/60	F18 WT	0.0401	*	Fig 1 - Fig Supp 1A	1/8
F21	WT	22	55/60				Fig 1 - Fig Supp 1A	1/8
F21	wdr-5	25	52/60	F21 WT	<0.0001	****	Fig 1 - Fig Supp 1A	1/8
F24	WT	20	47/60				Fig 1 - Fig Supp 1A	1/8
F24	wdr-5	24	44/60	F24 WT	0.0041	**	Fig 1 - Fig Supp 1A	1/8
F27	WT	22	56/60				Fig 1 - Fig Supp 1A	1/8
F27	wdr-5	25	49/60	F27 WT	0.0004	***	Fig 1 - Fig Supp 1A	1/8
F30	WT	19	55/60				Fig 1 - Fig Supp 1A	1/8
F30	wdr-5	23	53/60	F30 WT	0.0222	*	Fig 1 - Fig Supp 1A	1/8
F33	WT	20	53/60				Fig 1 - Fig Supp 1A	1/8
F33	wdr-5	21	50/60	F33 WT	0.0162	*	Fig 1 - Fig Supp 1A	1/8
F43	WT	20	83/90				Fig 1 - Fig Supp 1A	1/8
F43	wdr-5	23	81/90	F43 WT	0.0024	**	Fig 1 - Fig Supp 1A	1/8
F49	WT	16	54/60				Fig 1 - Fig Supp 1A	1/8
F49	wdr-5	22	53/60	F49 WT	<0.0001	****	Fig 1 - Fig Supp 1A	1/8
F3	WT	16	53/60				Fig 1 - Fig Supp 1B	3/8
F3	wdr-5	16	46/60	F3 WT	0.7599		Fig 1 - Fig Supp 1B	3/8
F10	WT	18	56/60				Fig 1 - Fig Supp 1B	3/8
F10	wdr-5	20	56/60	F10 WT	0.6916		Fig 1 - Fig Supp 1B	3/8
F18	WT	19	58/60				Fig 1 - Fig Supp 1B	3/8
F18	wdr-5	23	47/60	F18 WT	0.0028	**	Fig 1 - Fig Supp 1B	3/8
F24	WT	20	57/60				Fig 1 - Fig Supp 1B	3/8
F24	wdr-5	23	56/60	F24 WT	0.0023	**	Fig 1 - Fig Supp 1B	3/8
F3	WT	15	53/60				Fig 1 - Fig Supp 1C	4/8
F3	wdr-5	16	54/60	F3 WT	0.1616		Fig 1 - Fig Supp 1C	4/8
F18	WT	15	83/90				Fig 1 - Fig Supp 1C	4/8
F18	wdr-5	18	83/90	F18 WT	<0.0001	****	Fig 1 - Fig Supp 1C	4/8
F24	WT	19	78/90				Fig 1 - Fig Supp 1C	4/8
F24	wdr-5	20	76/90	F24 WT	0.0047	**	Fig 1 - Fig Supp 1C	4/8
F13	WT	18	74/90				Fig 1 - Fig Supp 1D	5/8
F13	wdr-5	22	70/90	F13 WT	0.0569		Fig 1 - Fig Supp 1D	5/8
F22	WT	19	79/90				Fig 1 - Fig Supp 1D	5/8
F22	wdr-5	21	73/90	F22 WT	0.2053		Fig 1 - Fig Supp 1D	5/8
F32	WT	18	74/90				Fig 1 - Fig Supp 1D	5/8
F32	wdr-5	19	57/90	F32 WT	0.0012	**	Fig 1 - Fig Supp 1D	5/8
late	WT	18	69/90				Fig 1 - Fig Supp 1E	6/8
F4	wdr-5	17	75/90	WT in this assay	0.4868		Fig 1 - Fig Supp 1E	6/8
mid	WT	16	81/90				Fig 1 - Fig Supp 1E	6/8
F15	wdr-5	17	65/90	WT in this assay	0.6203		Fig 1 - Fig Supp 1E	6/8
early	WT	16	89/90				Fig 1 - Fig Supp 1E	6/8
F23	wdr-5	19	63/90	WT in this assay	<0.0001	****	Fig 1 - Fig Supp 1E	6/8
late	WT	16	72/90				Fig 1 - Fig Supp 1E	6/8
F31	wdr-5	18	61/90	WT in this assay	0.0053	**	Fig 1 - Fig Supp 1E	6/8
F5	WT	17	69/90				Fig 1 - Fig Supp 1F	7/8
F3	wdr-5	18	77/90	F5 WT	0.9161		Fig 1 - Fig Supp 1F	7/8
F23	WT	19	80/90				Fig 1 - Fig Supp 1F	7/8
F21	wdr-5	22	74/90	F23 WT	0.0002	***	Fig 1 - Fig Supp 1F	7/8
F4	WT	18	76/90				Fig 1 - Fig Supp 1G	8/8
F4	wdr-5	17	66/90	F4 WT	0.4337		Fig 1 - Fig Supp 1G	8/8
F12	WT	17	66/90				Fig 1 - Fig Supp 1G	8/8
F12	wdr-5	16	67/90	F12 WT	0.5356		Fig 1 - Fig Supp 1G	8/8
F20	WT	14	84/90				Fig 1 - Fig Supp 1G, Fig Supp 2A	8/8
F20	wdr-5	18	77/90	F20 WT	<0.0001	****	Fig 1 - Fig Supp 1G, Fig Supp 2A	8/8
F21	WT	15	85/90				Fig 1 - Fig Supp 2C	1/1
F20	WT from starved population	18	80/90	F21 WT	0.0013	**	Fig 1 - Fig Supp 2C	1/1
F21	wdr-5	21	68/90				Fig 1 - Fig Supp 2C	1/1
F20	wdr-5 from starved population	19	81/90	F21 wdr-5	0.06	*	Fig 1 - Fig Supp 2C	1/1
mid	WT	16	49/60				Fig 1 - Fig Supp 2D	1/4
F1	wdr-5	14	49/60	WT in this assay	0.2471		Fig 1 - Fig Supp 2D	1/4
F34	wdr-5	21	46/60	WT in this assay	0.0002	***	Fig 1 - Fig Supp 2D	1/4
mid	WT	15	53/60				rep of Fig 1 - Fig Supp 2D	2/4
F3	wdr-5	16	54/60	WT in this assay	0.1616		rep of Fig 1 - Fig Supp 2D	2/4
F24	wdr-5	23	56/60	WT in this assay	<0.0001	****	rep of Fig 1 - Fig Supp 2D	2/4
late	WT	18	74/90				rep of Fig 1 - Fig Supp 2D	3/4
F4	wdr-5	22	70/90	WT in this assay	0.0569		rep of Fig 1 - Fig Supp 2D	3/4
F41	wdr-5	22	67/90	WT in this assay	0.0136	**	rep of Fig 1 - Fig Supp 2D	3/4
F17	WT	18	74/90				rep of Fig 1 - Fig Supp 2D	4/4
F4	wdr-5	17	75/90	F17 WT	0.4868		rep of Fig 1 - Fig Supp 2D	4/4
F32	wdr-5	19	57/90	F17 WT	0.0012	**	rep of Fig 1 - Fig Supp 2D	4/4
F61	wdr-5	19	74/90	F17 WT	0.008	**	rep of Fig 1 - Fig Supp 2D	4/4
F1	WT (empty vector)	19	87/90				Fig 1 - Fig Supp 3	1/1
F1	WT (wdr-5 RNAi)	19	88/90	F2 WT (EV)	0.347		Fig 1 - Fig Supp 3	1/1
F8	WT (empty vector)	20	86/90				Fig 1 - Fig Supp 3	1/1
F8	WT (wdr-5 RNAi)	19	87/90	F8 WT (EV)	0.927		Fig 1 - Fig Supp 3	1/1
F12	WT (empty vector)	20	80/90				Fig 1 - Fig Supp 3	1/1
F12	WT (wdr-5 RNAi)	20	88/90	F12 WT (EV)	0.035	*	Fig 1 - Fig Supp 3	1/1
F4	WT	18	76/90				rep of Fig 2A	2/3
F4	wdr-5	17	66/90	F4 WT	0.8944		rep of Fig 2A	2/3
F12	WT	16	70/90	F4 WT	0.4196		rep of Fig 2A	2/3
F12	wdr-5	18	75/90	F12 WT	0.5356		rep of Fig 2A	2/3
F40	WT	16	67/90	F4 WT	0.0167	*	rep of Fig 2A	2/3
F38	wdr-5	22	61/90	F40 WT	<0.0001	****	rep of Fig 2A	2/3
				F12 wdr-5	<0.0001	****
F4	WT	17	83/90				rep of Fig 2A	3/3
F4	wdr-5	17	78/90	F4 WT	0.4808		rep of Fig 2A	3/3
				F32 WT	0.0481	*
F32	WT	15	73/90	F4 WT	0.1153		rep of Fig 2A	3/3
F30	wdr-5	21	72/90	F4 WT	<0.0001	****	rep of Fig 2A	3/3
				F32 WT	<0.0001	****
F2	WT (from thaw)	17	77/90				Fig. 2 - Fig Supp 1	1/1
F2	WT (wdr-5 outcross)	16	83/90	WT from thaw	0.023	*	Fig. 2 - Fig Supp 1	1/1
F2	widr-5 (wdr-5 outcross)	15	78/90	WT from outcross	0.3214		Fig. 2 - Fig Supp 1	1/1
F4	WT	16	89/90				rep of Fig 4B	2/3
F24	met-2	14	53/90	F4 WT	0.0001	***	rep of Fig 4B	2/3
F15	WT	16	72/90				rep of Fig 4B	3/3
F13	met-2	14	62/90	F15 WT	0.0074	**	rep of Fig 4B	3/3
F33	met-2	13	58/90	F15 WT	<0.0001	****	rep of Fig 4B	3/3
early	WT	23	79/90				rep of Fig 4C	2/2
F2	wdr-5 met-2	13	58/89	WT in this assay	<0.0001	****	rep of Fig 4C	2/2
F33	wdr-5	25	58/90	WT in this assay	0.0022	**	rep of Fig 4C	2/2
F2	met-2	21	74/90	WT in this assay	0.018	*	rep of Fig 4C	2/2
late	WT	16	53/60				rep of Fig 4D	2/3
F3	jhdm-1	18	54/60	WT in this assay	0.0553		rep of Fig 4D	2/3
late	WT	15	51/60				rep of Fig 4D	2/3
F12	jhdm-1	18	52/60	WT in this assay	0.0003	***	rep of Fig 4D	2/3
mid	WT	18	50/60				rep of Fig 4D	3/3
F1	jhdm-1	18	56/60	WT in this assay	0.065		rep of Fig 4D	3/3
late	WT	17	53/60				rep of Fig 4D	3/3
F12	jhdm-1	21	54/60	WT in this assay	<0.0001	****	rep of Fig 4D	3/3
F31	WT (from thaw)	15	86/90				Fig 4 - Fig Supp 1	1/1
F2	WT (jhdm-1 outcross)	15	86/90	WT from thaw	0.8777		Fig 4 - Fig Supp 1	1/1
F2	jhdm-1 (jhdm-1 outcross)	16	87/90	WT from outcross	0.0574		Fig 4 - Fig Supp 1	1/1
late	WT	17	51/60				rep of Fig 5B	2/3
F3	WT (wdr-5)	21	39/50	WT in this assay	0.0086	**	rep of Fig 5B	2/3
F3	wdr-5 (wdr-5)	21	51/60	WT in this assay	0.0216	*	rep of Fig 5B	2/3
late	WT	22	56/60				rep of Fig 5C	1/2
F5	WT (wdr-5)	21	54/60	WT in this assay	0.7662		rep of Fig 5C	1/2
F5	wdr-5 (wdr-5)	24	48/60	WT in this assay	0.0264	*	rep of Fig 5C	1/2
late	WT	21	87/90				rep of Fig 5B	3/3
F3	WT (wdr-5)	22	52/90	WT in this assay	0.0457	*	rep of Fig 5B	3/3
F3	wdr-5 (wdr-5)	23	58/90	WT in this assay	0.0003	***	rep of Fig 5B	3/3
mid	WT	17	83/90				rep of Fig 5E, Fig 5- Fig Supp 1A	2/2
F3	met-2 ("wdr-5")	16	53/90	WT in this assay	0.0002	***	rep of Fig 5E, Fig 5- Fig Supp 1A	2/2
F3	WT ("wdr-5")	20	46/90	WT in this assay	0.0132	*	rep of Fig 5E, Fig 5- Fig Supp 1A	2/2
F3	WT (wdr-5)	20	58/90	WT in this assay	0.0177	*	Fig 5- Fig Supp 1
F3	wdr-5 (wdr-5)	19	56/90	WT in this assay	0.0485	*	Fig 5- Fig Supp 1
late	met-2	15	68/90	WT in this assay	0.0001	***	Fig 5- Fig Supp 1
early	WT	14	57/60				rep of Fig 5F	2/4
F3	WT (jhdm-1)	18	45/60	WT in this assay	0.0814		rep of Fig 5F	2/4
F3	jhdm-1 (jhdm-1)	21	50/60	WT in this assay	<0.0001	****	rep of Fig 5F	2/4
F18	WT	15	72/90				rep of Fig 5F	3/4
F3	WT (jhdm-1)	19	67/90	WT in F3 assay	<0.0001	****	rep of Fig 5F	3/4
F3	jhdm-1 (jhdm-1)	22	80/90	WT in F3 assay	<0.0001	****	rep of Fig 5F	3/4
F20	WT	16	62/90				rep of Fig 5G	2/3
F5	WT (jhdm-1)	17	68/90	WT in F5 assay	0.0394	*	rep of Fig 5G	2/3
F5	jhdm-1 (jhdm-1)	19	71/90	WT in F5 assay	0.0021	**	rep of Fig 5G	2/3
F27	WT	17	81/90				rep of Fig 5F	4/4
F4	WT (jhdm-1)	19	80/90	WT in F4 assay	0.0013	**	rep of Fig 5F	4/4
F4	jhdm-1 (jhdm-1)	20	89/90	WT in F4 assay	<0.0001	****	rep of Fig 5F	4/4
F30	WT	17	87/90				rep of Fig 5G	3/3
F7	WT (jhdm-1)	16	82/90	WT in F7 assay	0.8945		rep of Fig 5G	3/3
F7	jhdm-1 (jhdm-1)	19	77/90	WT in F7 assay	0.0021	**	rep of Fig 5G	3/3
late	WT	17	47/60				Fig 5 - Fig Supp 1B	1/2
F3	WT (met-2)	17	48/60	WT in this assay	0.3474		Fig 5 - Fig Supp 1B	1/2
F3	met-2 (met-2)	13	50/60	WT in this assay	<0.0001	****	Fig 5 - Fig Supp 1B	1/2
late	WT	19	52/60				Fig 5 - Fig Supp 1C	1/2
F5	WT (met-2)	19	51/60	WT in this assay	0.042	*	Fig 5 - Fig Supp 1C	1/2
F5	met-2 (met-2)	14	49/60	WT in this assay	<0.0001	****	Fig 5 - Fig Supp 1C	1/2
late	WT	17	53/60				rep of Fig 5 - Fig Supp 1B	2/2
F3	WT (met-2)	17	46/60	WT in this assay	0.794		rep of Fig 5 - Fig Supp 1B	2/2
late	WT	19	46/60				rep of Fig 5 - Fig Supp 1C	2/2
F5	WT (met-2)	18	60/60	WT in this assay	0.9798		rep of Fig 5 - Fig Supp 1C	2/2
