# Supplementary material for: Repressive H3K9me2 protects lifespan against the transgenerational burden of COMPASS activity in C. elegans
Source: eLife journal article supplement (doi:10.7554/elife.48498), 2019-12-09
Supplement: supp [file elife-48498-supp-v1.zip › elife_poa_e48498_Supplementary_file_4.xlsx]

## Sheet: Sheet1
Lee et al. - supplementary table 4
locus	sample	replicate	Ab ChIP		Ab input		no Ab ChIP		no Ab input		fold enrich.
			rel. DNA quant.	st. dev	rel. DNA quant.	st. dev.	rel. DNA quant.	st. dev.	rel. DNA quant.	st. dev.
Y48G9.7	WT	1	55.7548	2.43641	176487	20153.4	16.7959	1.87564	165053	24990.4	3.10448
		2	24.1803	5.43622	91045.6	32789	6.54613	1.02682	86706.3	25897.9	3.51779
	F4 WT (jhdm-1)	1	54.9874	1.37235	62764	5533.86	7.61654	0.300513	67563.5	10161.8	7.77153
		2	19.1791	1.26834	21186.6	6611.44	1.53415	0.724687	26844	909.175	15.8396
	F4 jhdm-1 (jhdm-1)	1	165.159	5.62214	151779	14743.4	21.8199	0.829429	131288	6475.04	6.54731
		2	56.5131	2.03843	99589.6	15027.1	2.89871	0.423821	117021	315.611	22.9083
	F7 WT (jhdm-1)	1	49.5782	3.063	99514.7	13342.1	10.3899	3.61672	99031.7	7624.82	4.74861
		2	8.28207	1.36542	21772.2	8569.52	2.63192	1.09931	18644.4	3119.19	2.69471
	F7 jhdm-1 (jhdm-1)	1	229.522	10.7857	168392	3926.96	25.8692	3.15878	174235	7808.41	9.18024
		2	4.53175	1.43307	15525.8	--	0.428004	1.15414	18613.4	--	12.6937
Y18H1A.14	WT	1	29.4408	0.0281271	137928	1911.06	14.373	4.00547	149845	14628.9	2.22531
		2	4.65148	0.433148	14732	5382.14	3.04202	0.26537	29807.1	--	3.09376
	F4 WT (jhdm-1)	1	29.317	1.026	62732.6	8459.53	8.44716	2.04729	67499.6	9930.07	3.73436
		2	7.86129	1.71795	30885.2	14797.7	1.12297	0.0855566	64393.8	18726.7	14.5955
	F4 jhdm-1 (jhdm-1)	1	85.3745	14.9203	125187	14592.4	19.8967	3.97159	148887	10567.6	5.10323
		2	62.8198	21.0562	86823.3	10411.6	6.86516	4.09242	61657.9	13490.8	6.49828
	F7 WT (jhdm-1)	1	22.723	3.74947	95269.3	15242.9	13.1968	5.14381	81093	2820.92	1.46565
		2	5.39715	0.238755	14903	3655.58	1.791	1.07007	7963.64	5287.24	1.6103
	F7 jhdm-1 (jhdm-1)	1	112.988	5.83897	117018	8752.69	12.8526	0.603081	128242	10785.4	9.63425
		2	27.4812	1.38397	45627.7	7970.22	10.5568	4.30382	133360	20805.7	7.60852
dhhc-7	WT	1	33.9486	3.81375	98680.6	5533.15	10.0337	0.107714	107373	6492.93	3.6815
		2	12.9667	3.7087	41351.4	3684.36	3.71627	0.911679	43223.1	3488.14	3.64712
	F4 WT (jhdm-1)	1	30.5353	2.56821	37551.1	6599.83	4.07673	1.72975	30826.7	1600.42	6.14885
		2	8.08229	1.2451	15357.5	5374.01	1.77367	0.387987	18716.2	4519.11	5.55341
	F4 jhdm-1 (jhdm-1)	1	137.512	17.4135	94731.5	6607.97	9.09651	2.74356	99769.8	4129.9	15.921
		2	47.1388	11.5321	98180.6	18747.1	2.18215	0.116015	65083.3	11837.4	14.3198
	F7 WT (jhdm-1)	1	25.5944	2.96494	49917.1	6687.31	7.80773	2.49945	48898	9712.88	3.21116
		2	5.31874	0.429111	12518.7	1661.15	1.96682	0.714116	12584.5	5900.38	2.71845
	F7 jhdm-1 (jhdm-1)	1	172.123	8.15748	86012.8	1811.58	10.2584	4.87365	83702	14652.2	16.328
		2	1.73153	0.462191	10451.3	896.731	0.303853	0.109357	14822	6463.93	8.08169
Y92H12A.5	WT	1	34.9339	0.552047	88353.7	12582.7	12.3616	0.277323	95718	17445.9	3.06154
		2	14.1611	2.63604	33444	19885.6	3.8215	--	53637	11511.2	5.94306
	F4 WT (jhdm-1)	1	19.0621	1.83196	29008.5	7263.34	6.11076	2.31356	26476.7	6581.62	2.84717
		2	8.43399	0.962059	18556.9	3680.36	0.501214	0.364552	8556.89	3680.36	7.75926
	F4 jhdm-1 (jhdm-1)	1	87.4681	51.0933	77668.1	9590.15	10.585	6.16969	100666	16591.7	10.7102
		2	75.6119	11.3069	71006.4	8542.36	2.72148	0	70084.7	7274.75	27.4228
	F7 WT (jhdm-1)	1	20.2206	2.80163	26545.1	8658.47	10.8397	0	63214.9	8152.02	4.44233
		2	2.07792	0.306676	7660.69	4735.68	1.3522	0.627527	14483.2	7219.91	2.90525
	F7 jhdm-1 (jhdm-1)	1	149.419	1.72203	94373.2	1982.31	12.2306	0	102539	10699.3	13.2739
		2	65.4216	0.478427	110591	31209.2	2.84395	0.637234	74393.6	12633.7	15.4744
ubxn-1	WT	1	22.3522	1.74898	73393.1	15689.8	5.12034	0.569455	77836.7	4420.46	4.62967
		2	13.6462	0.46655	63684.1	15527.6	4.66761	0.271285	67344	14302.8	3.09161
	F4 WT (jhdm-1)	1	9.16263	1.18953	29252.8	5279.73	2.30623	0.947887	21062.4	5061.7	2.8606
		2	4.79826	0.0165665	20037	2048.81	2.83939	0.0948436	22739.7	4307.75	1.91784
	F4 jhdm-1 (jhdm-1)	1	40.3999	2.93233	74521.4	3001.85	4.7357	1.56182	73355.4	11572.5	8.39746
		2	22.2021	5.93999	59899.7	6875.54	3.74239	0.529775	114946	26429.7	11.3845
	F7 WT (jhdm-1)	1	11.7357	3.49083	36762.8	6477.77	5.22499	1.02887	29068.8	--	1.77599
		2	5.24768	0.0131075	10041	1944.58	1.53438	0.579208	11030.5	3339.7	3.75713
	F7 jhdm-1 (jhdm-1)	1	76.7086	6.49698	75845.2	9259.52	9.14773	0	70807.6	13563.4	7.82858
		2	4.60417	0.0701808	9430.17	935.422	2.09392	1.07976	36832.9	6287.4	8.58831
npp-8	WT	1	17.7182	3.8258	57457.1	7991.33	4.09562	1.03892	50049.7	14193.2	3.76841
		2	19.8669	3.50462	33535.7	6636.92	5.15633	0.734761	38684.6	5802.98	4.44446
	F4 WT (jhdm-1)	1	11.3927	0.238115	12667.1	3036.23	2.56518	0.297927	14775.8	3549.41	5.18064
		2	7.7812	0.810669	17556.4	9835.28	1.98401	0.210978	20124	4527.84	4.49554
	F4 jhdm-1 (jhdm-1)	1	29.9207	1.91784	49648.5	9110.47	3.40757	1.39399	48351.7	21318.9	8.55132
		2	38.6868	0.36189	70152.6	875.851	2.67357	0.683867	75699.3	5570.27	15.6142
	F7 WT (jhdm-1)	1	14.2697	3.68464	14890.3	2029.01	3.70317	2.26335	23316.2	2677.82	6.03389
		2	5.94554	1.30287	9029.6	2332.25	1.82161	0.55889	10365.7	870.477	3.74685
	F7 jhdm-1 (jhdm-1)	1	77.8887	3.37106	46646.5	9675.97	6.34546	1.2847	37685.4	9166.92	9.91666
		2	5.1136	0.43864	141753	15544	0.776783	3.32482	160383	18094.7	7.4482
