# Supplementary figures and images for: Repressive H3K9me2 protects lifespan against the transgenerational burden of COMPASS activity in C. elegans
Source: eLife journal article supplement (doi:10.7554/elife.48498), 2019-12-09

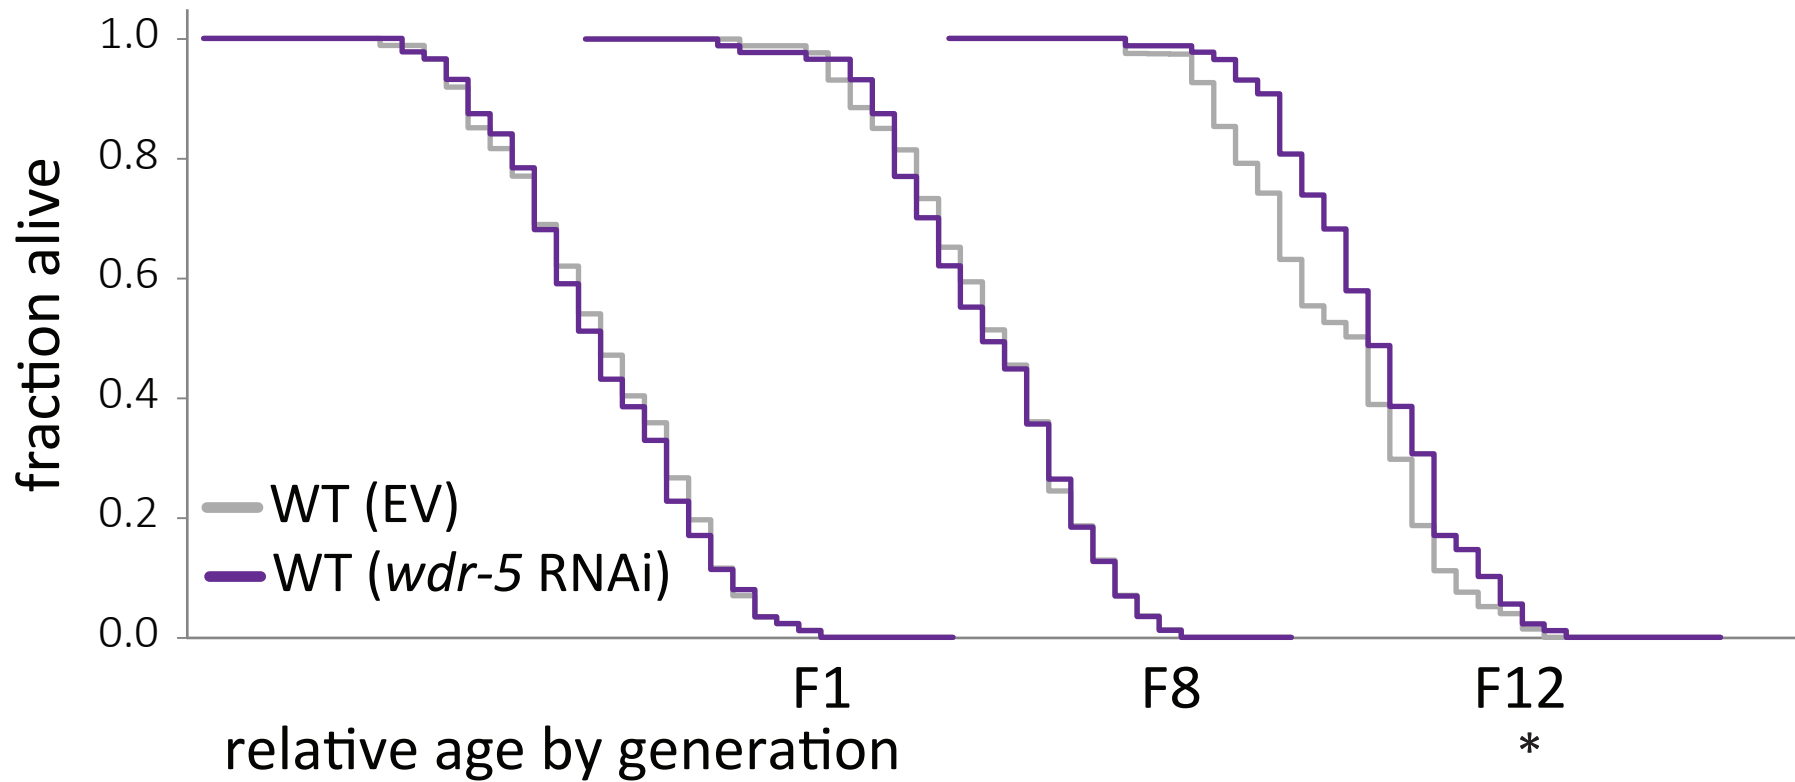

Supplement: supp [file elife-48498-supp-v1.zip]

**A**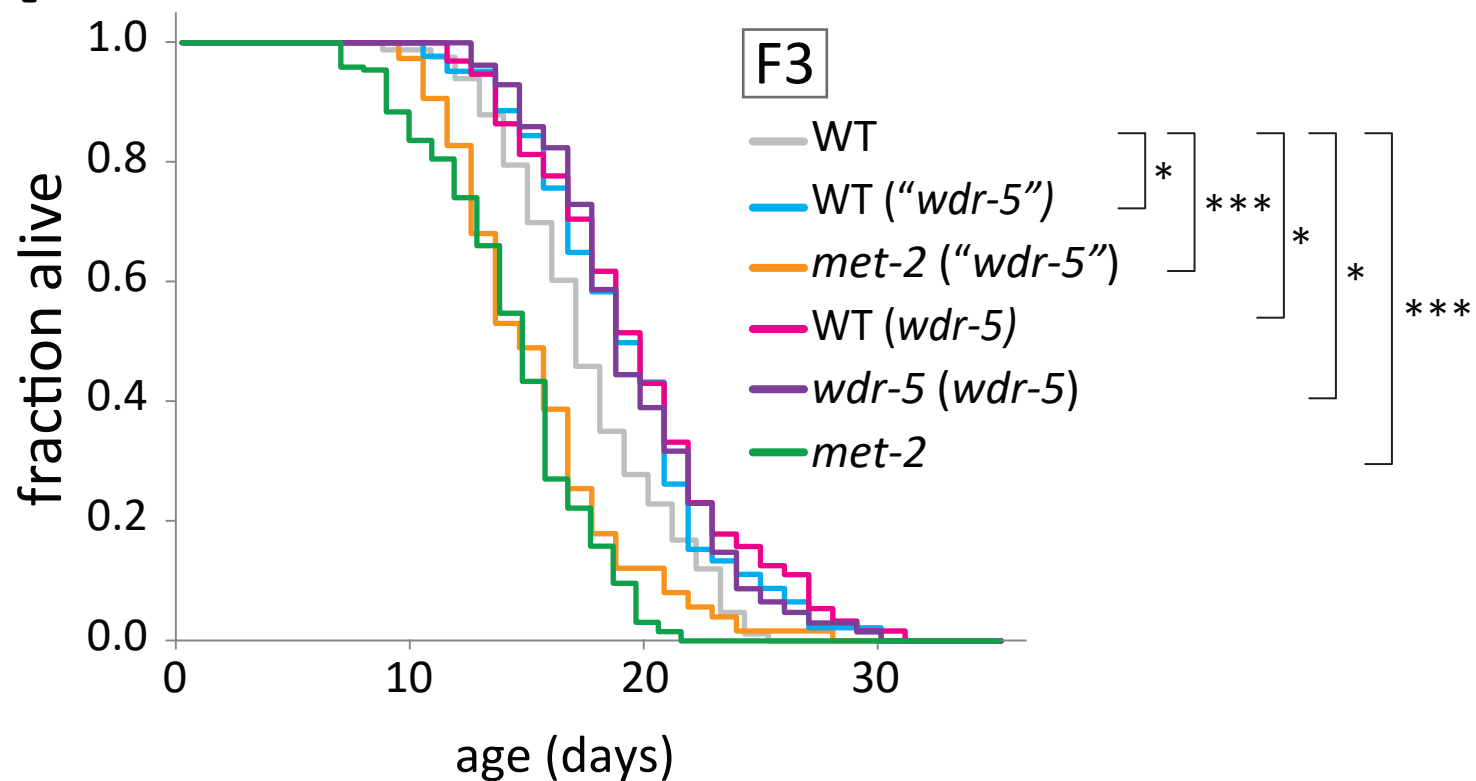**B**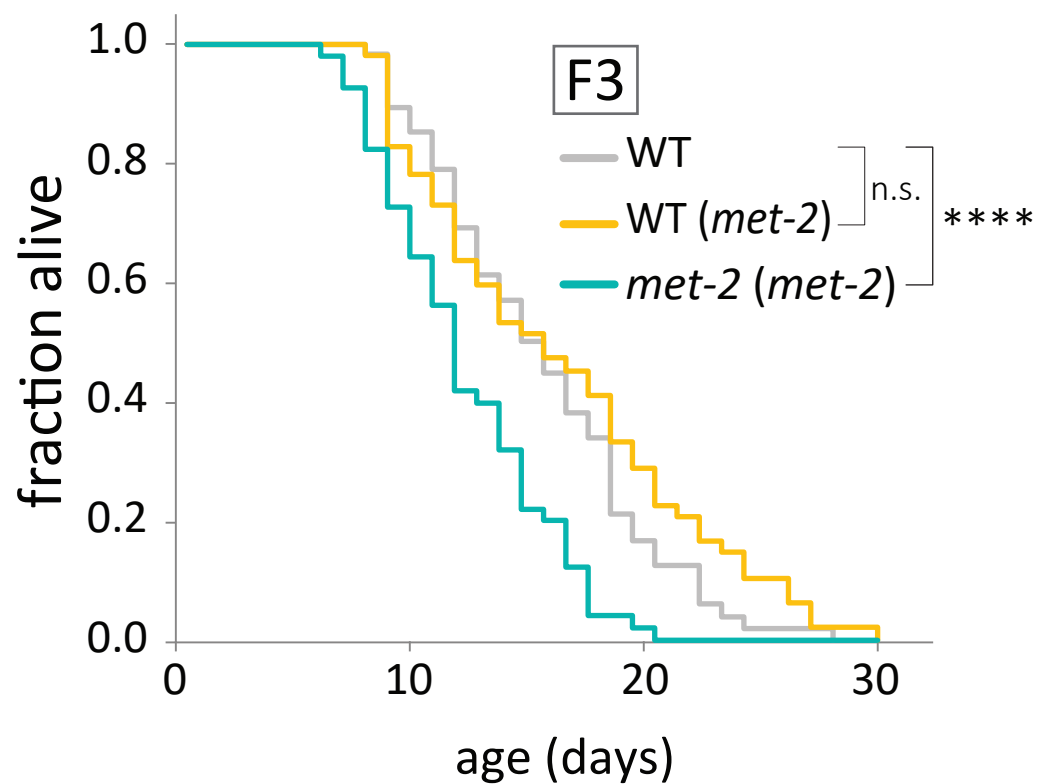**C**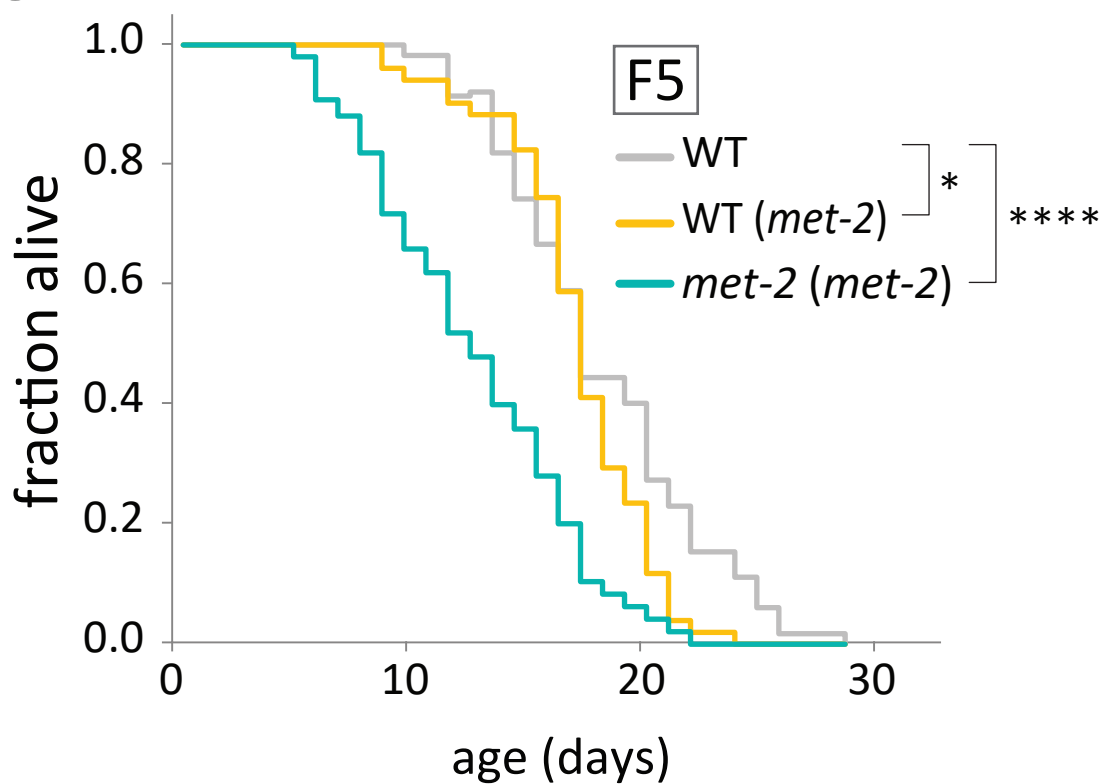

Supplement: supp [file elife-48498-supp-v1.zip › elife_poa_e48498_Figure_5_figure_supplement_1.pdf]

# A

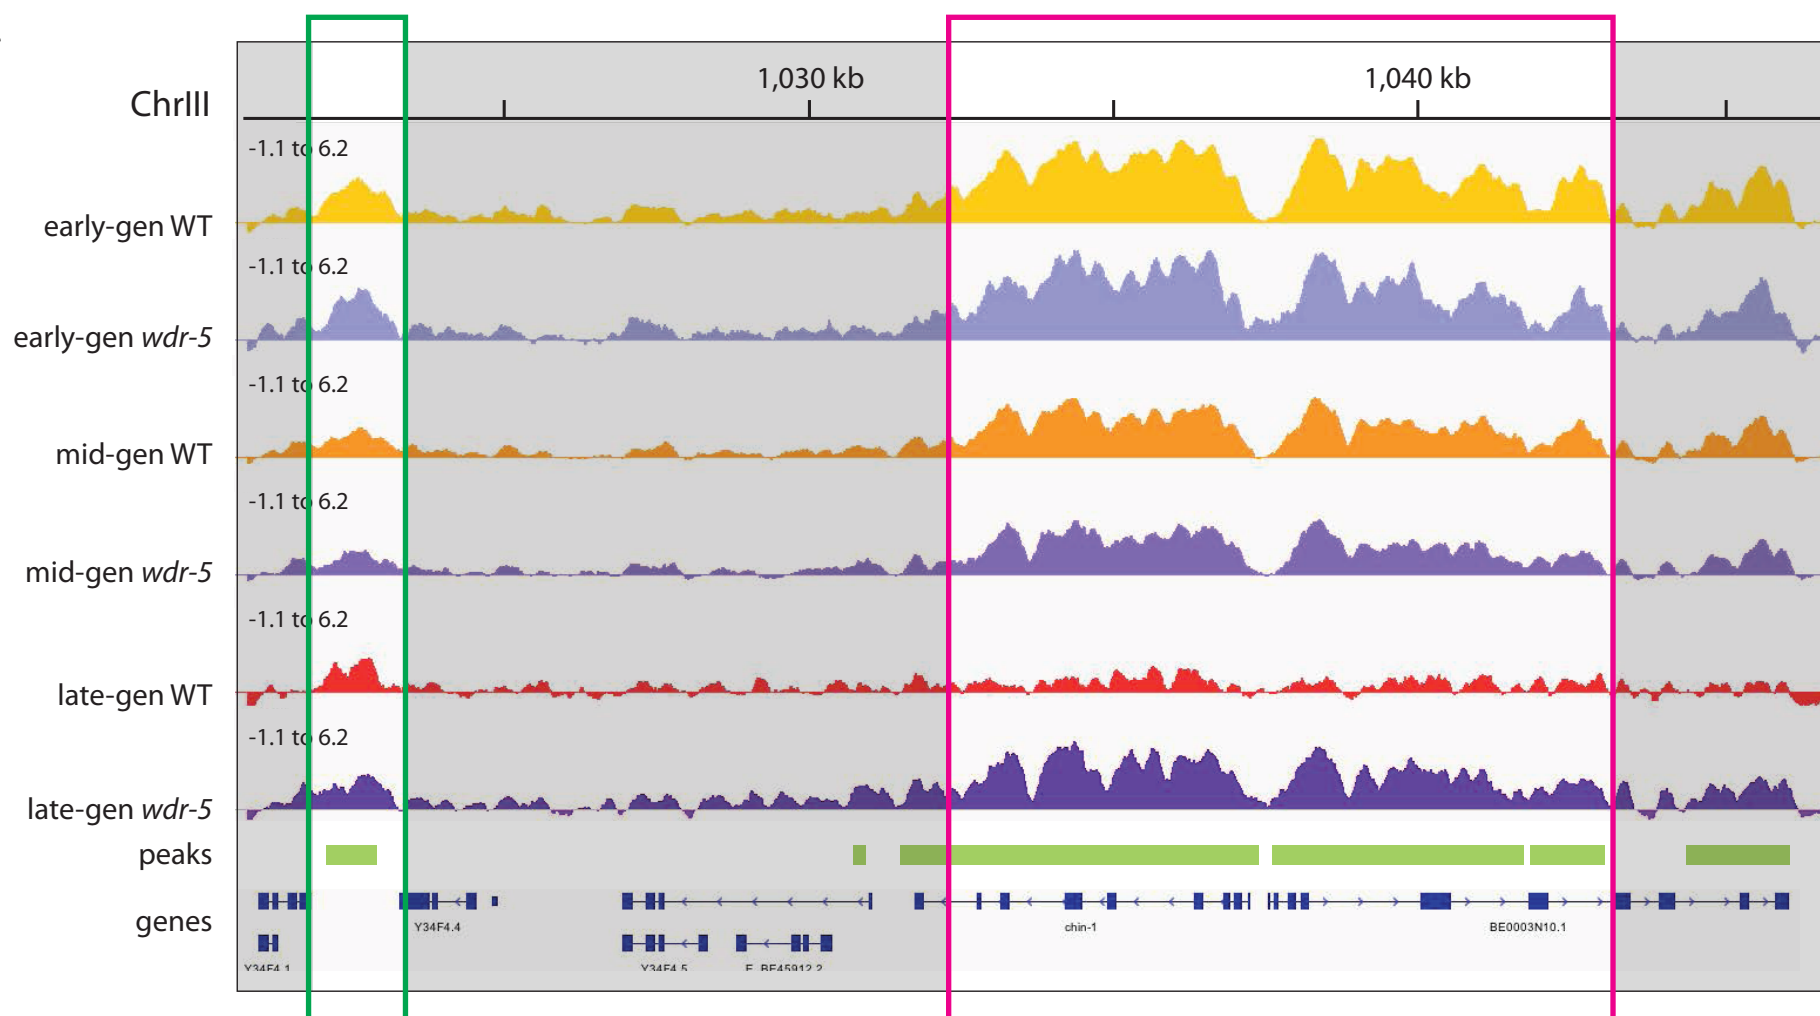

# B

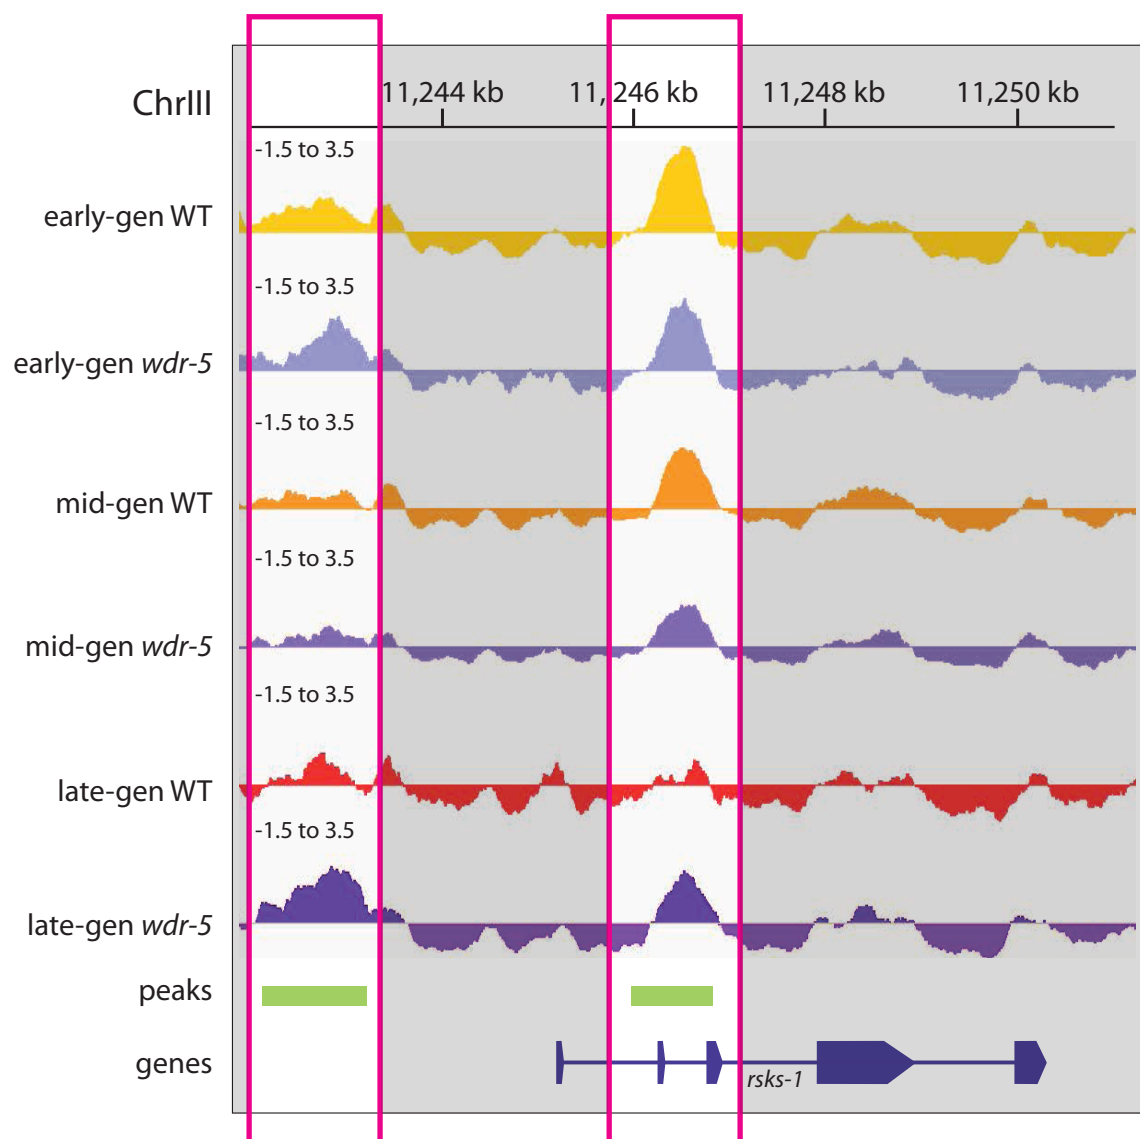

# C

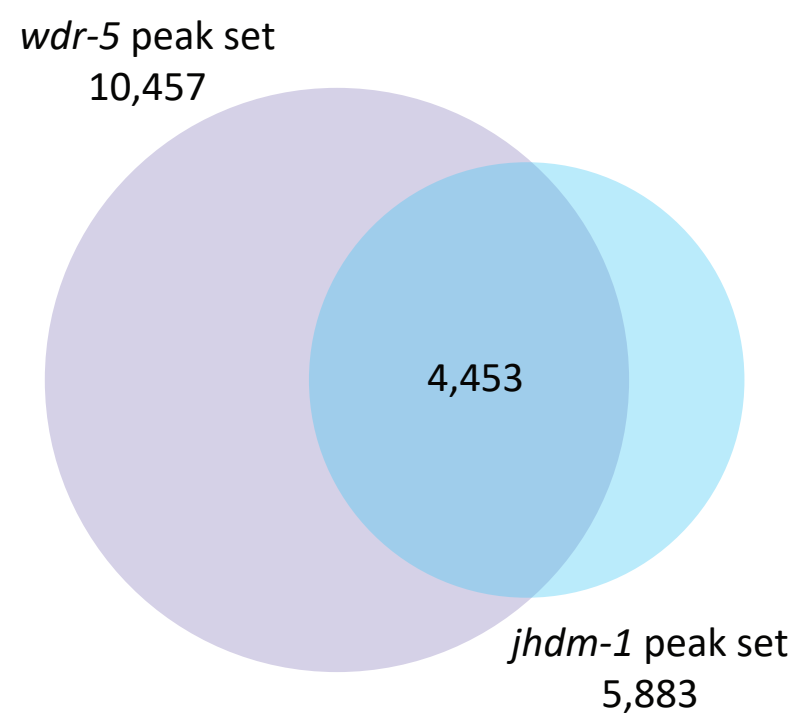

Supplement: supp [file elife-48498-supp-v1.zip › elife_poa_e48498_Figure_3_figure_supplement_1.pdf]

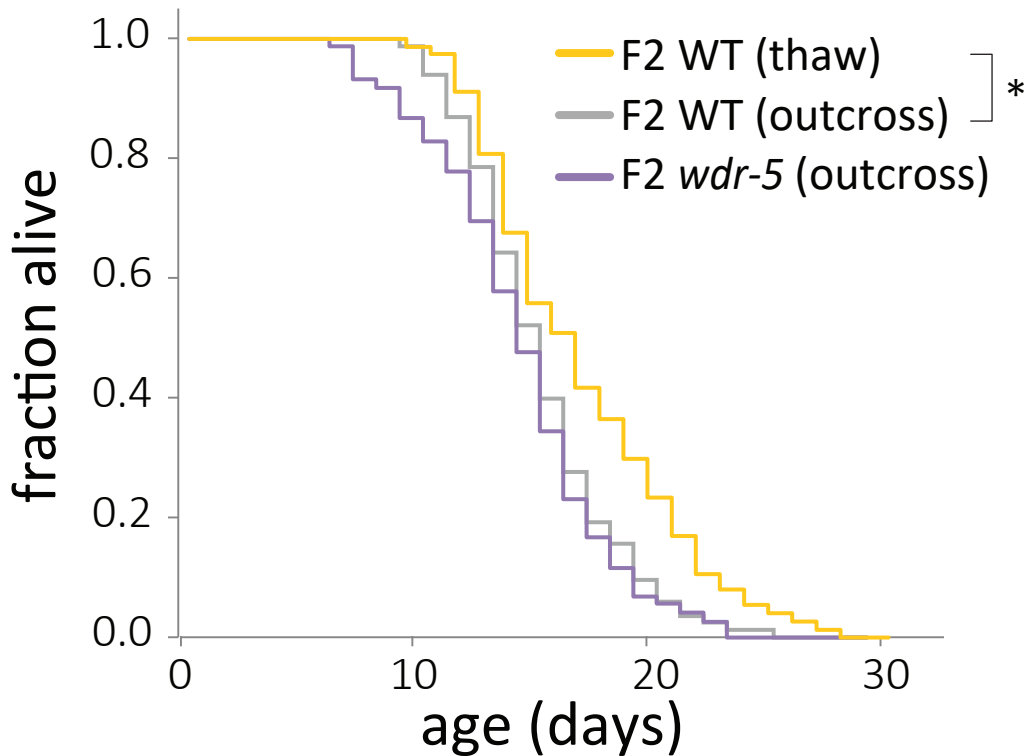

Supplement: supp [file elife-48498-supp-v1.zip › elife_poa_e48498_Figure_2_figure_supplement_1.pdf]

**A**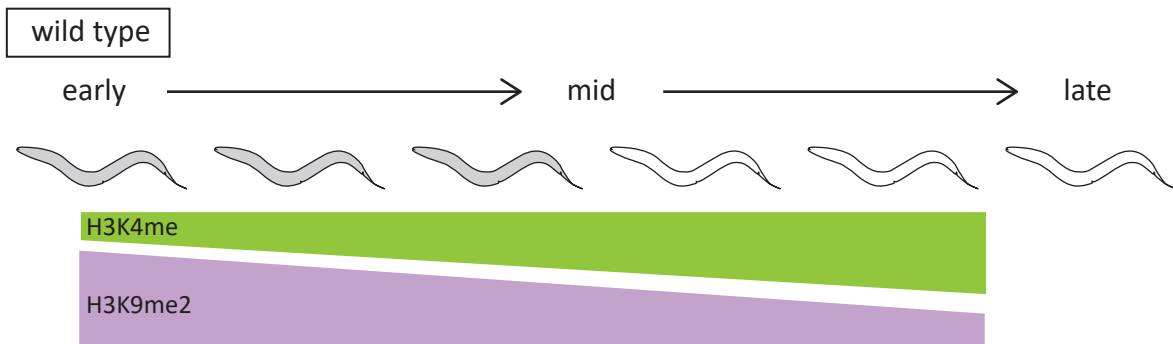**B**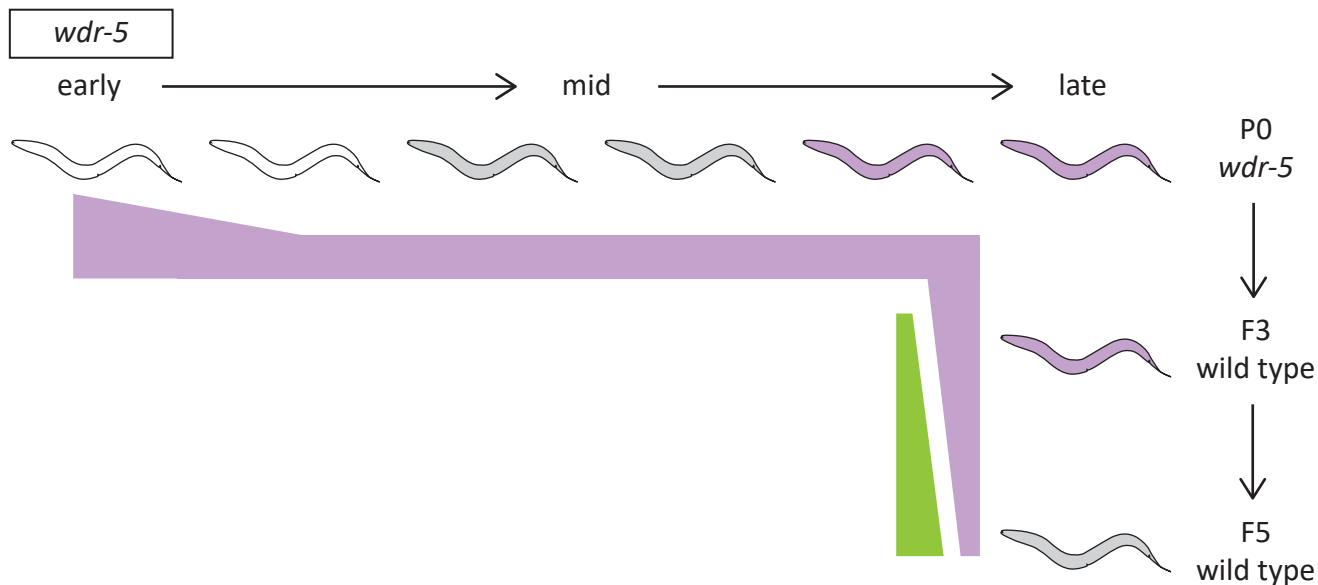

Supplement: supp [file elife-48498-supp-v1.zip › elife_poa_e48498_Figure_5_figure_supplement_2.pdf]

**A**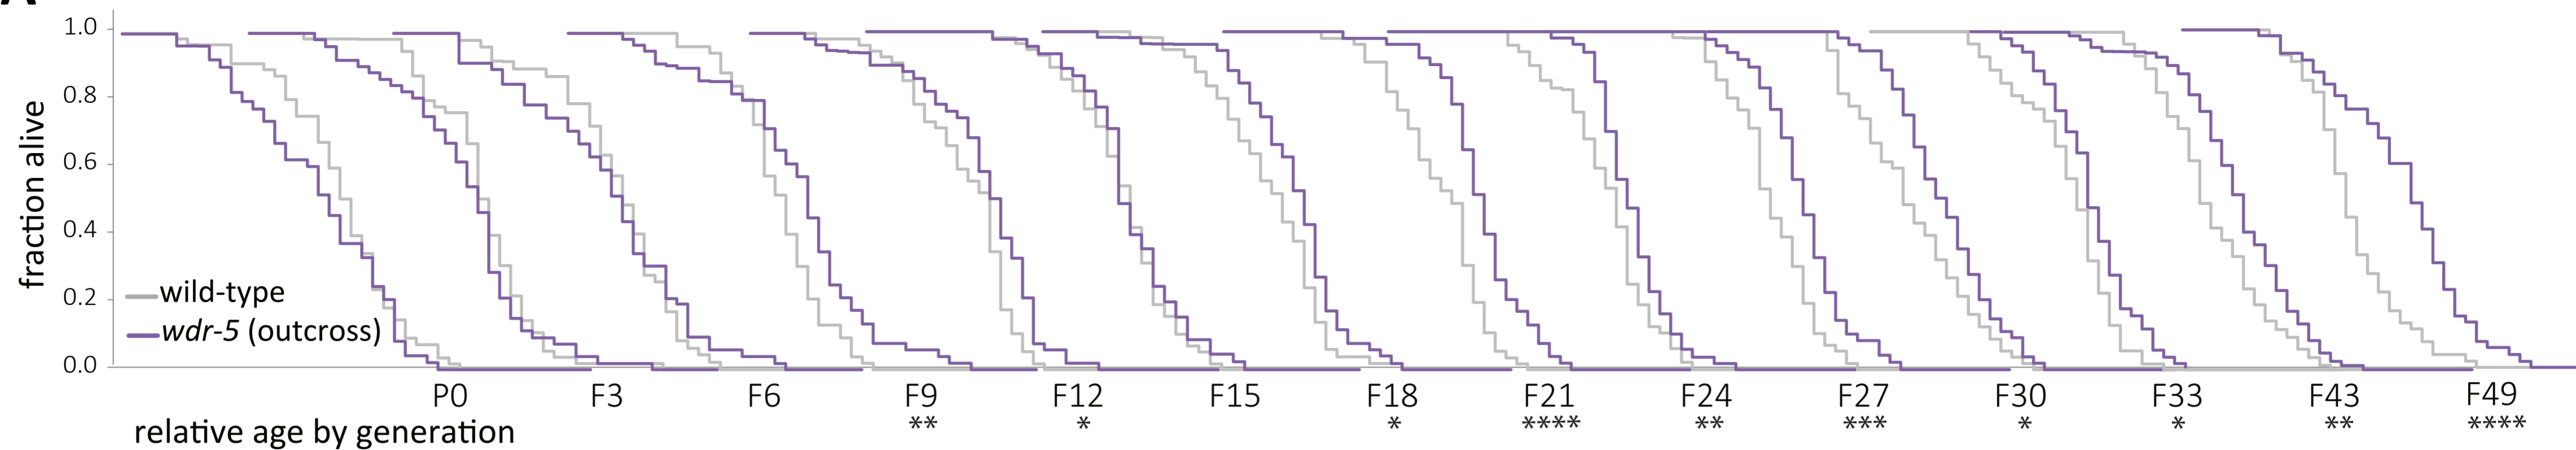**B**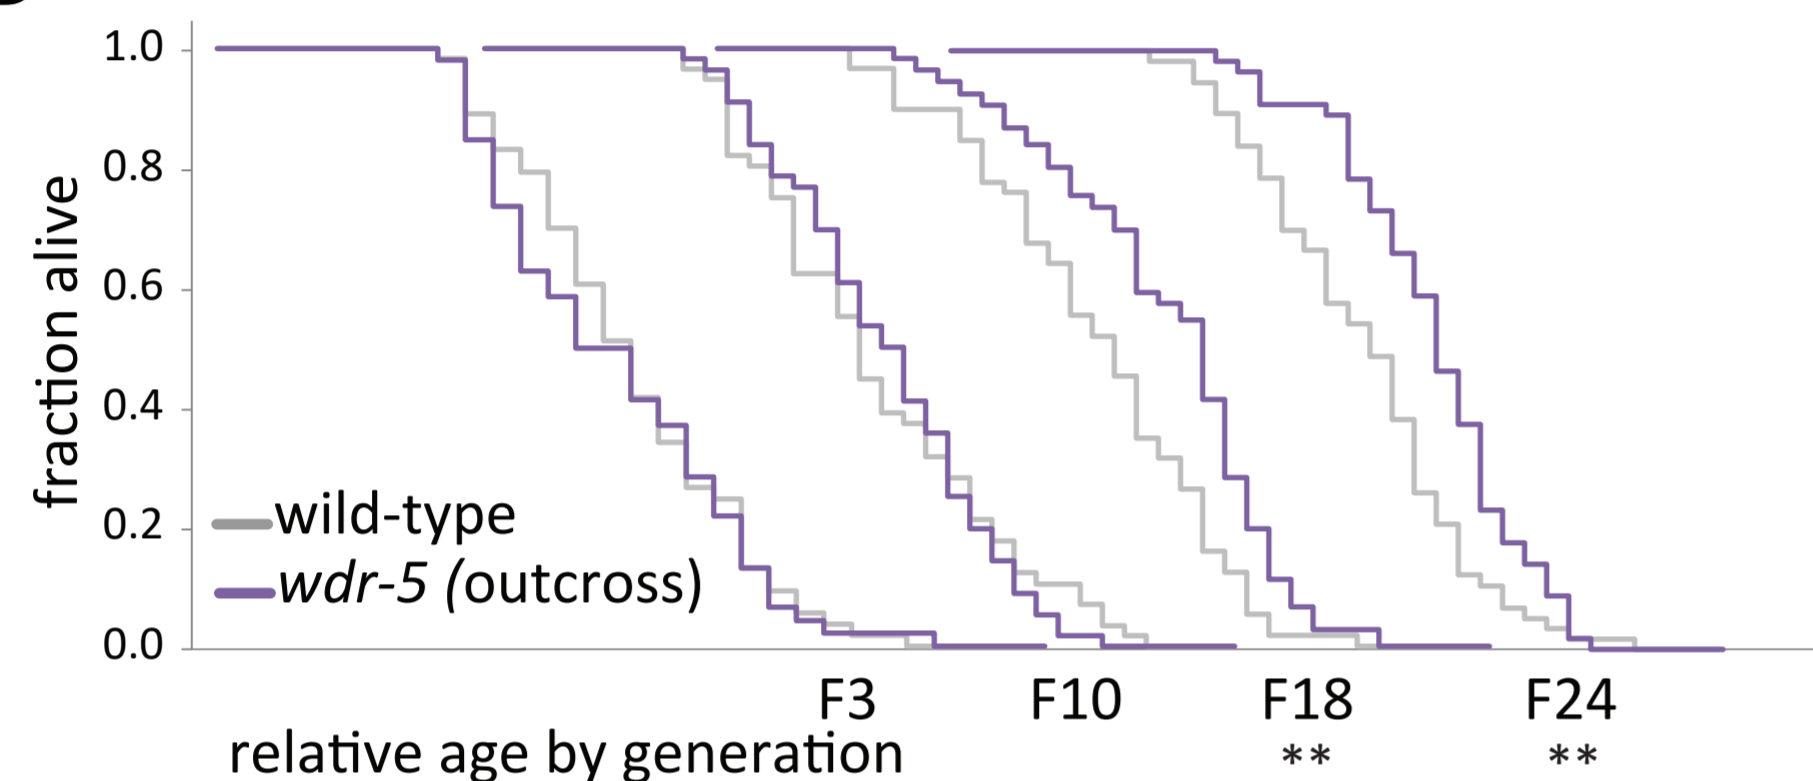**C**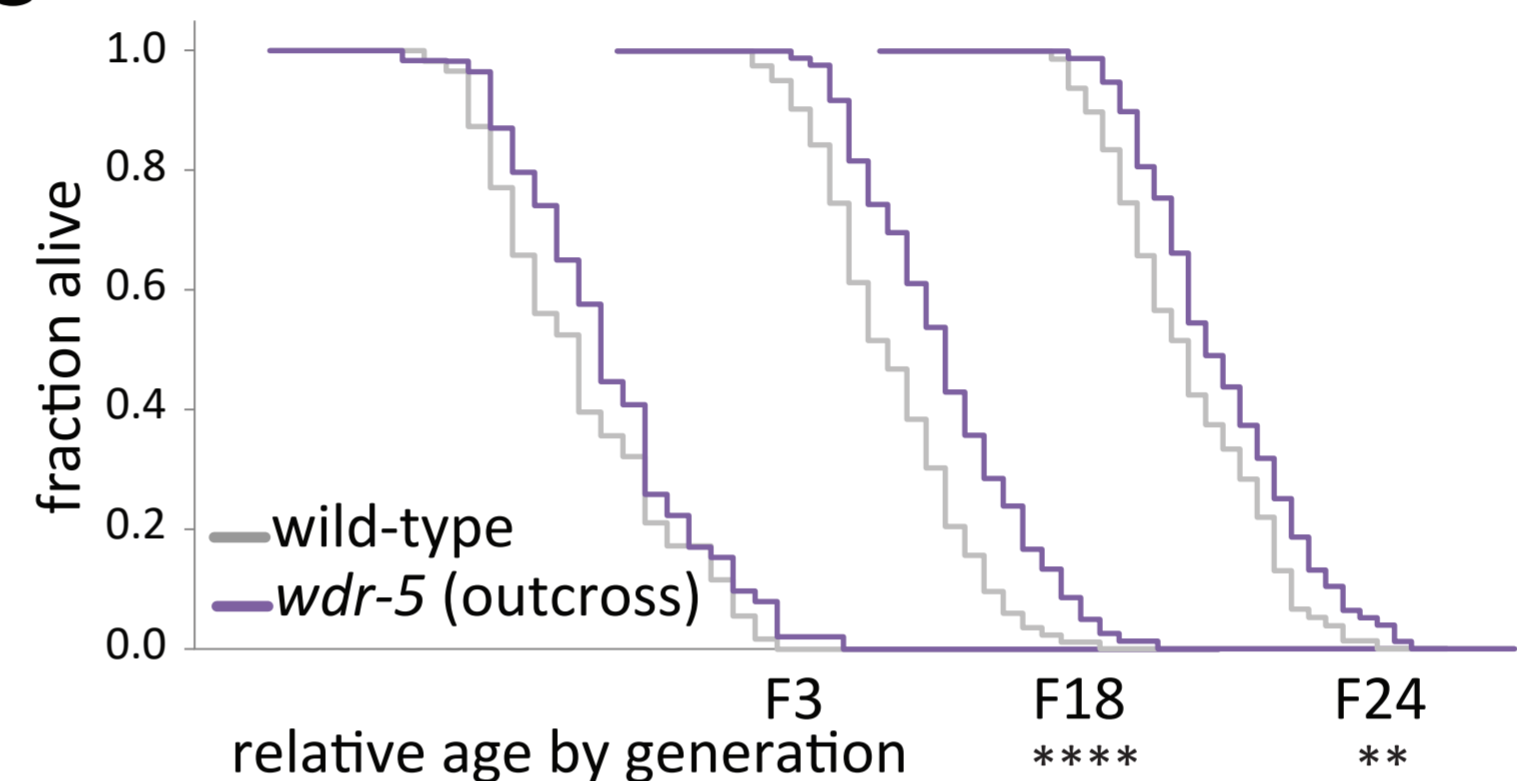**D**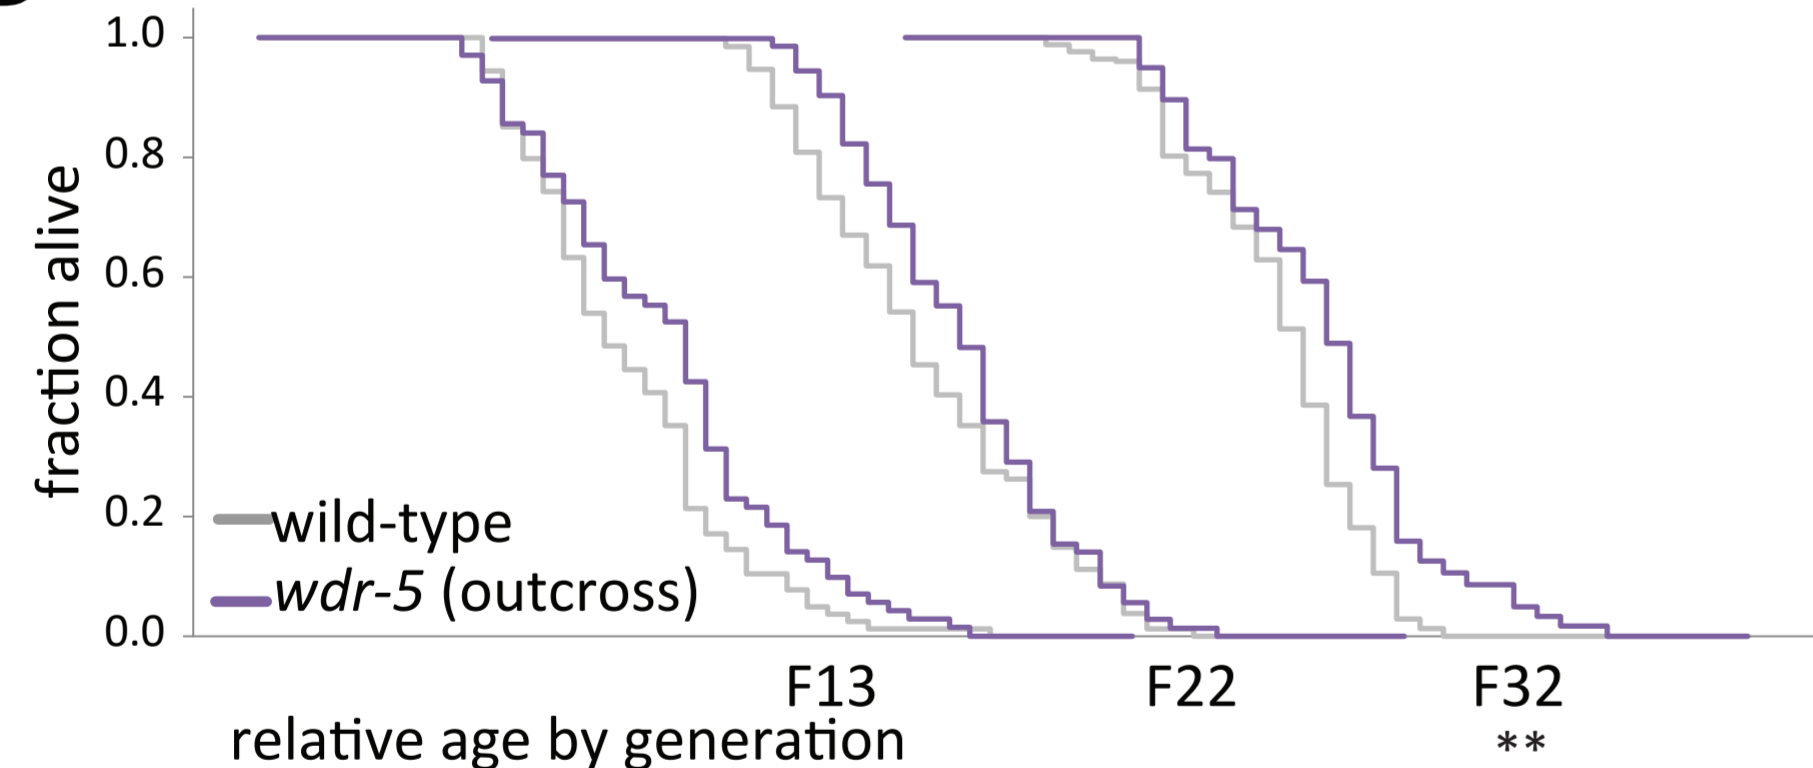**E**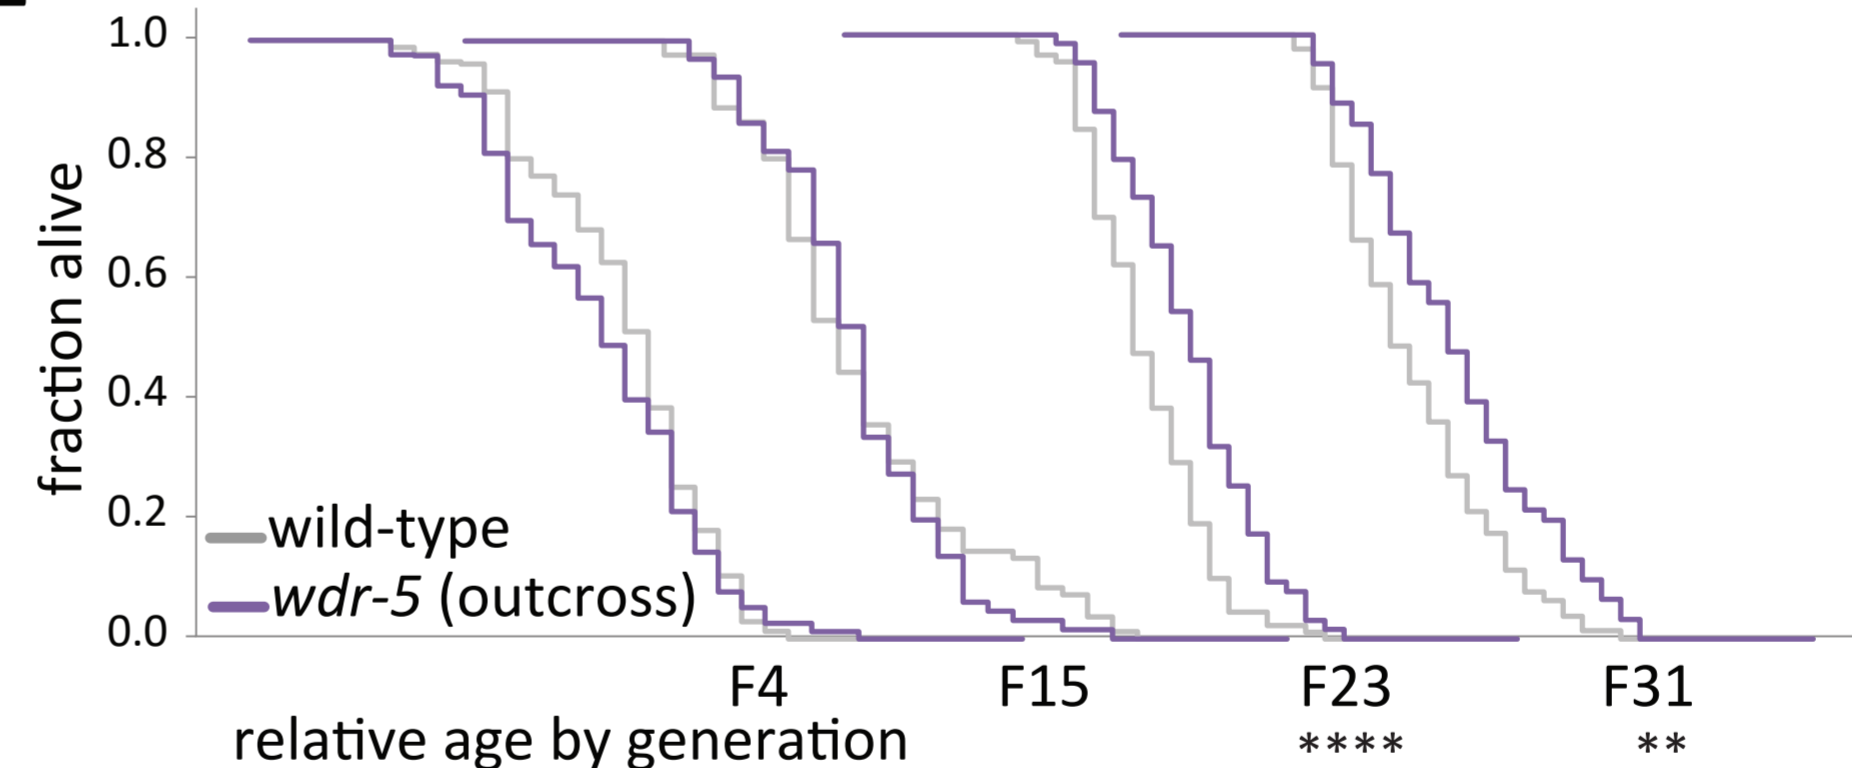**F**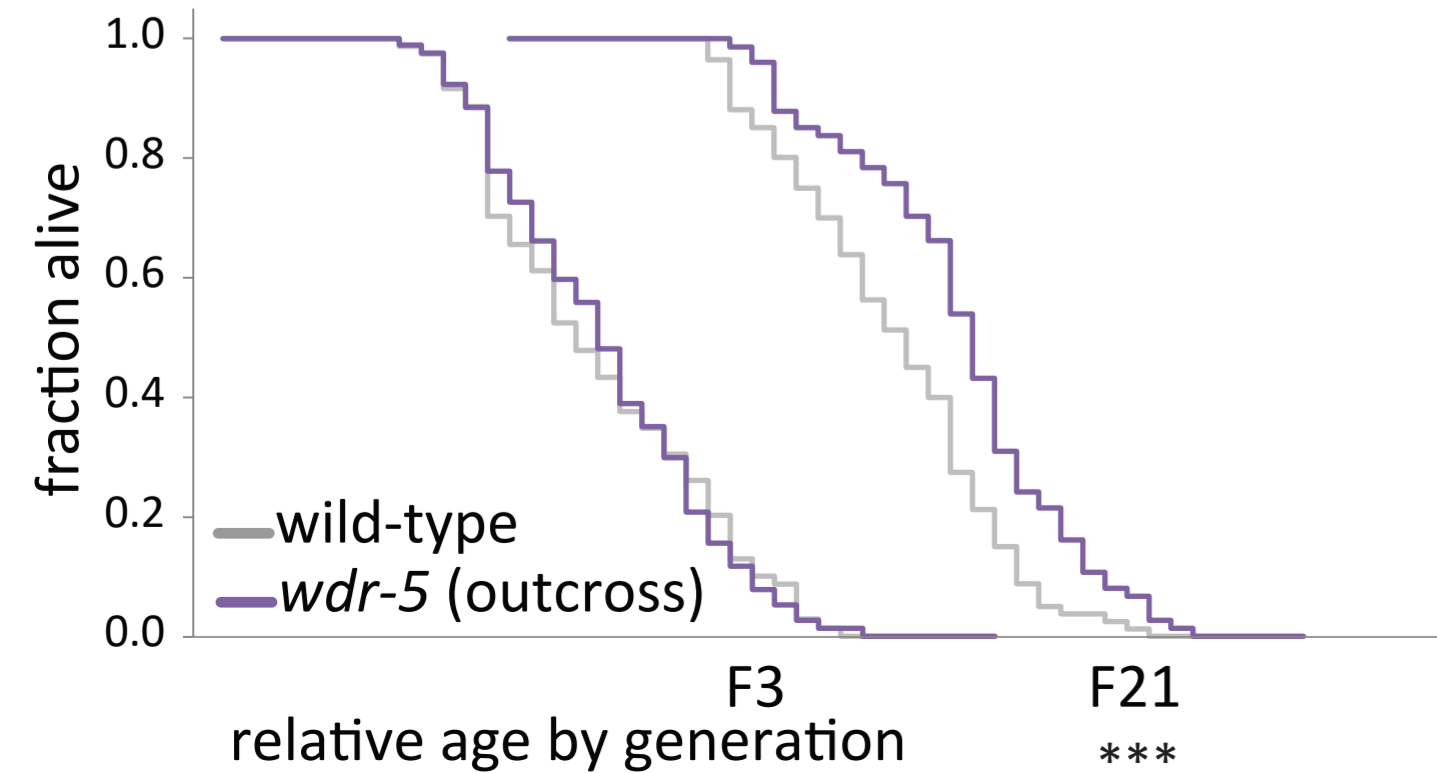**G**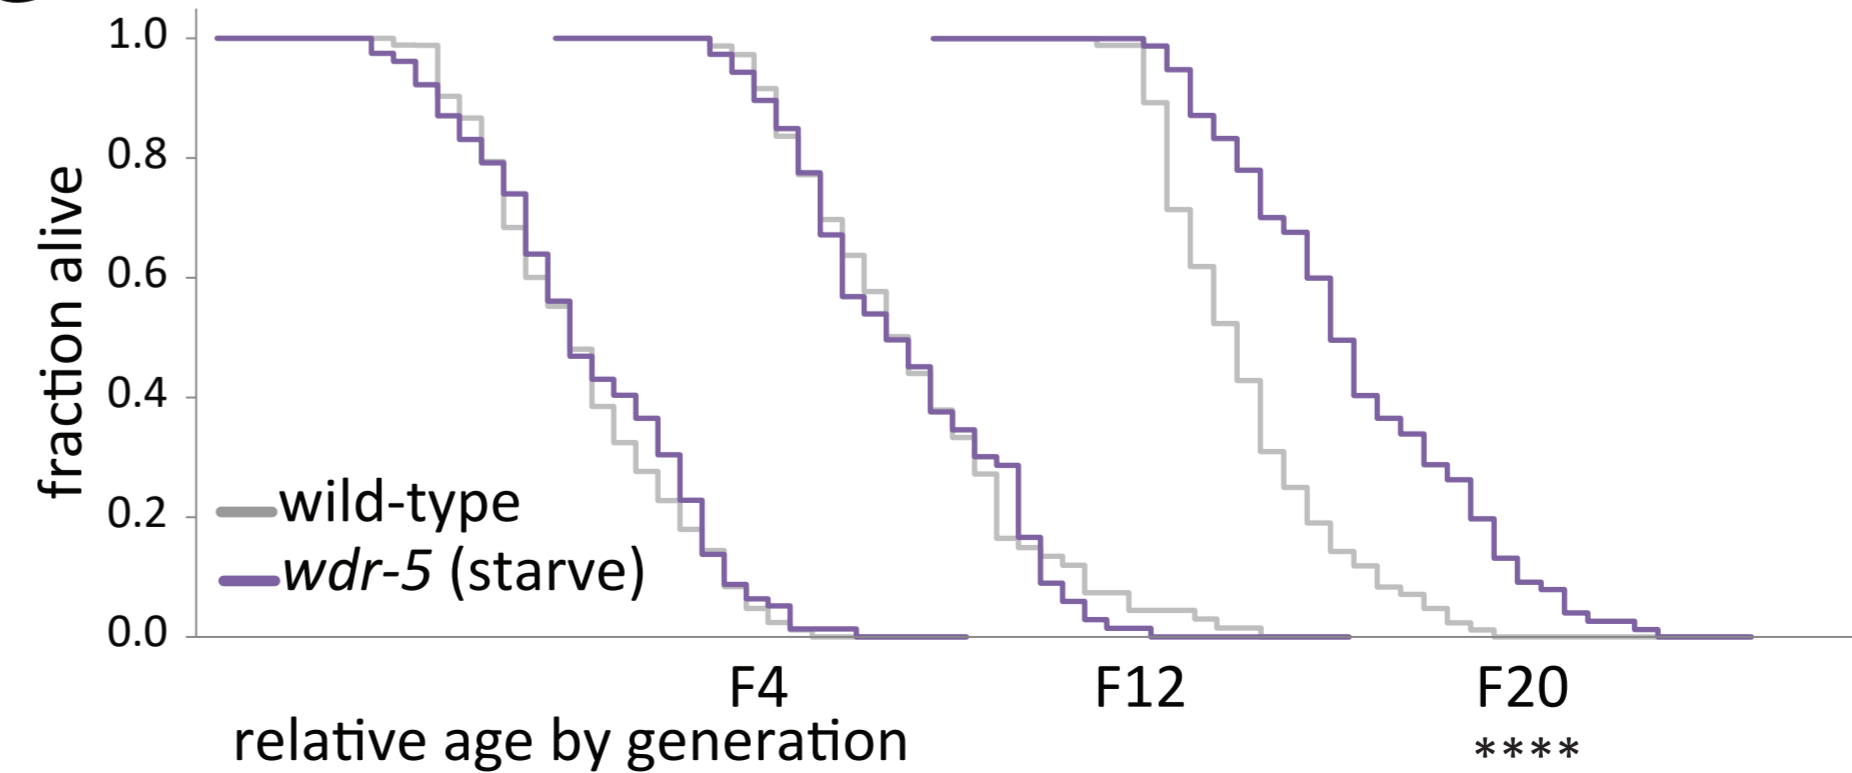

Supplement: supp [file elife-48498-supp-v1.zip › elife_poa_e48498_Figure_1_figure_supplement_1.pdf]

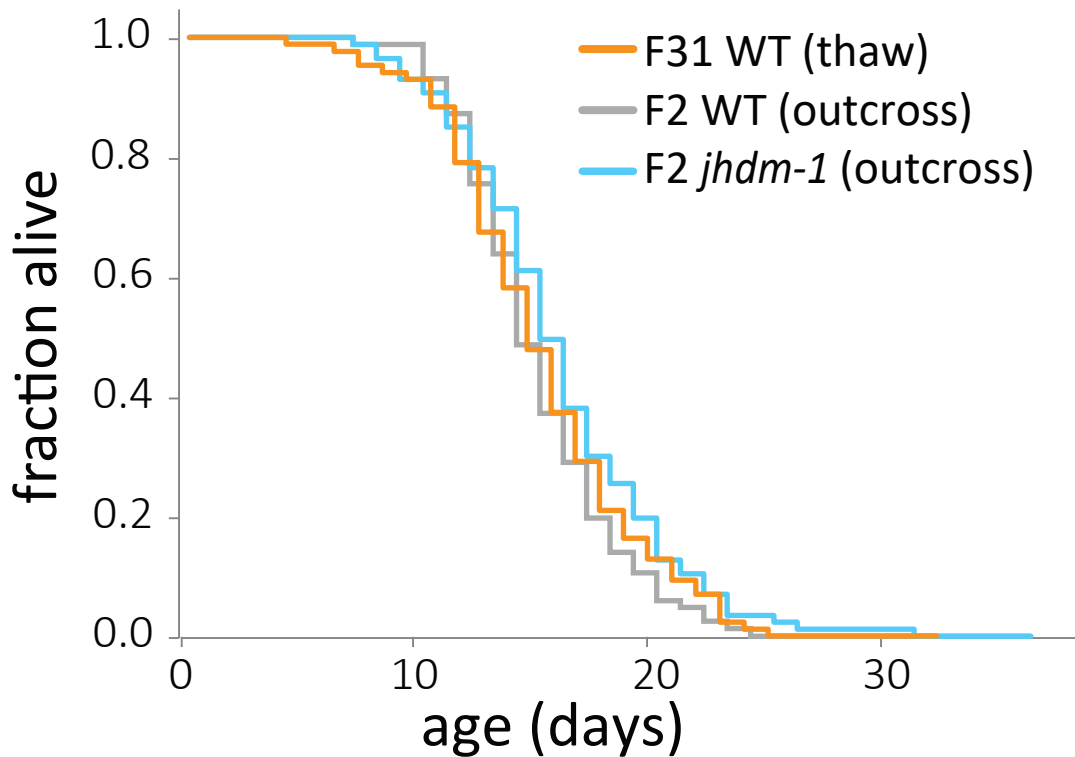

Supplement: supp [file elife-48498-supp-v1.zip › elife_poa_e48498_Figure_4_figure_supplement_1.pdf]

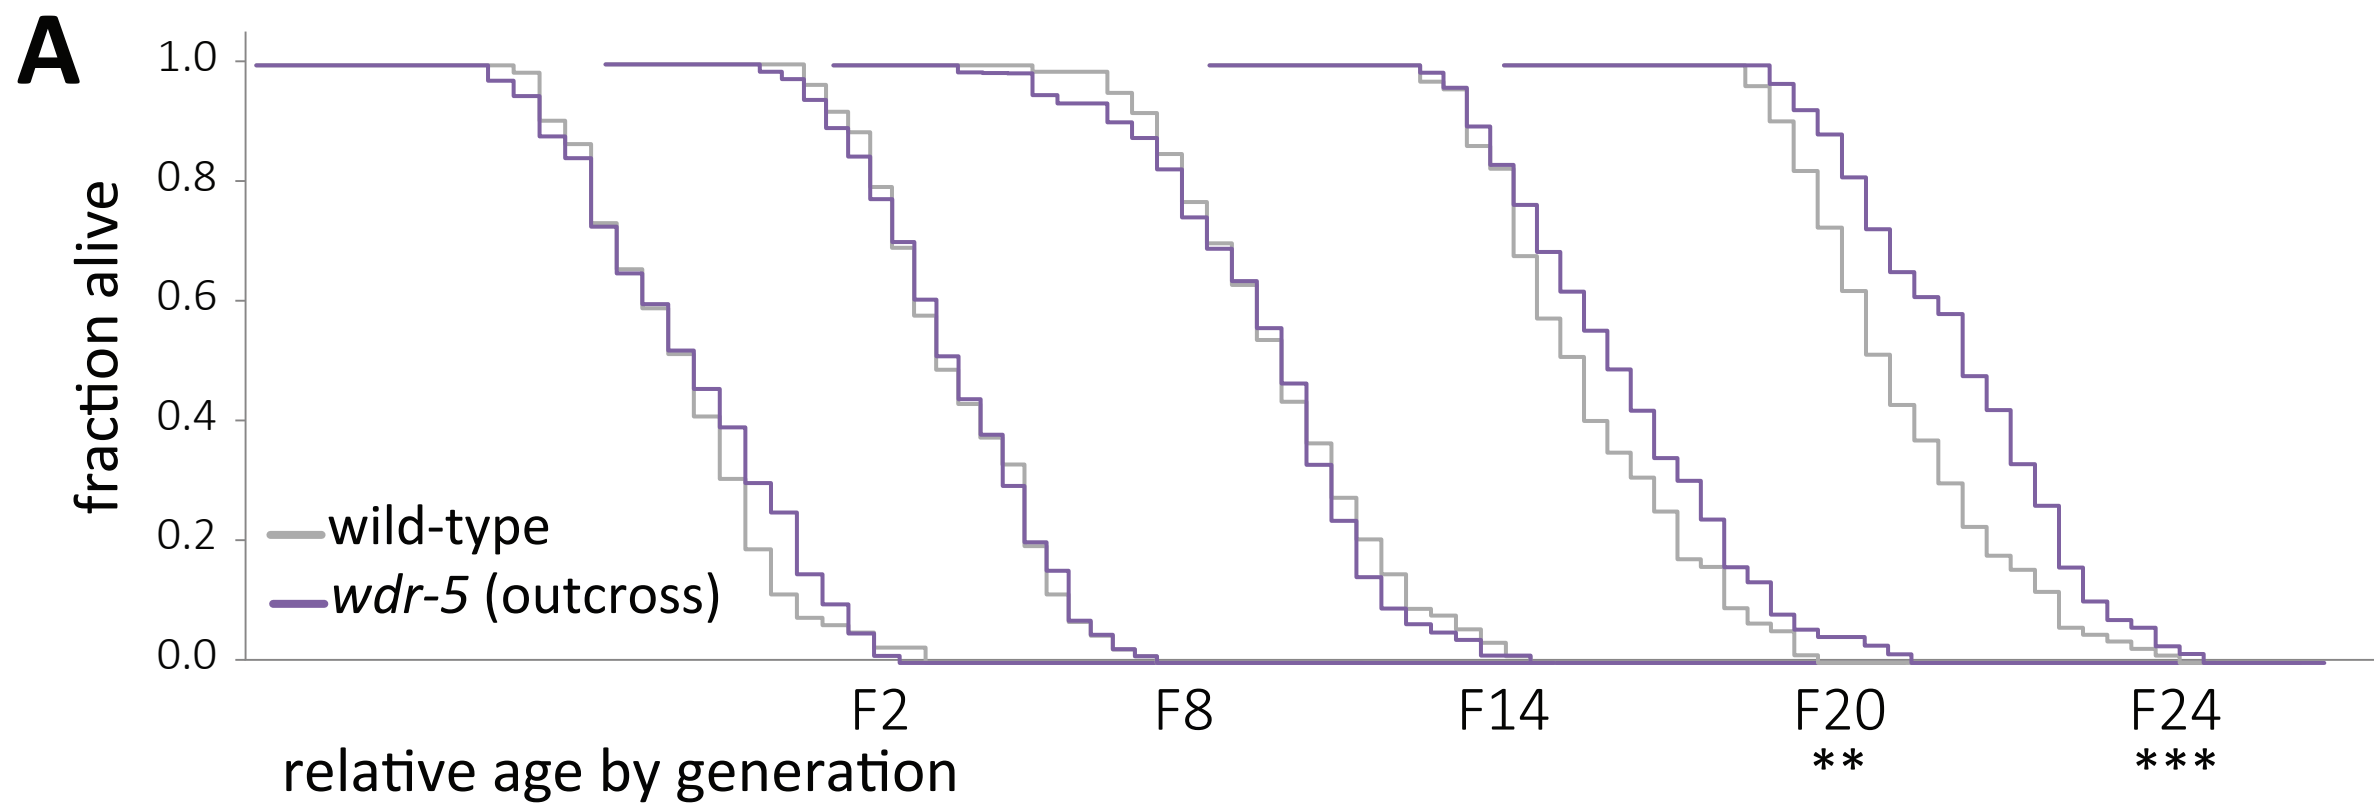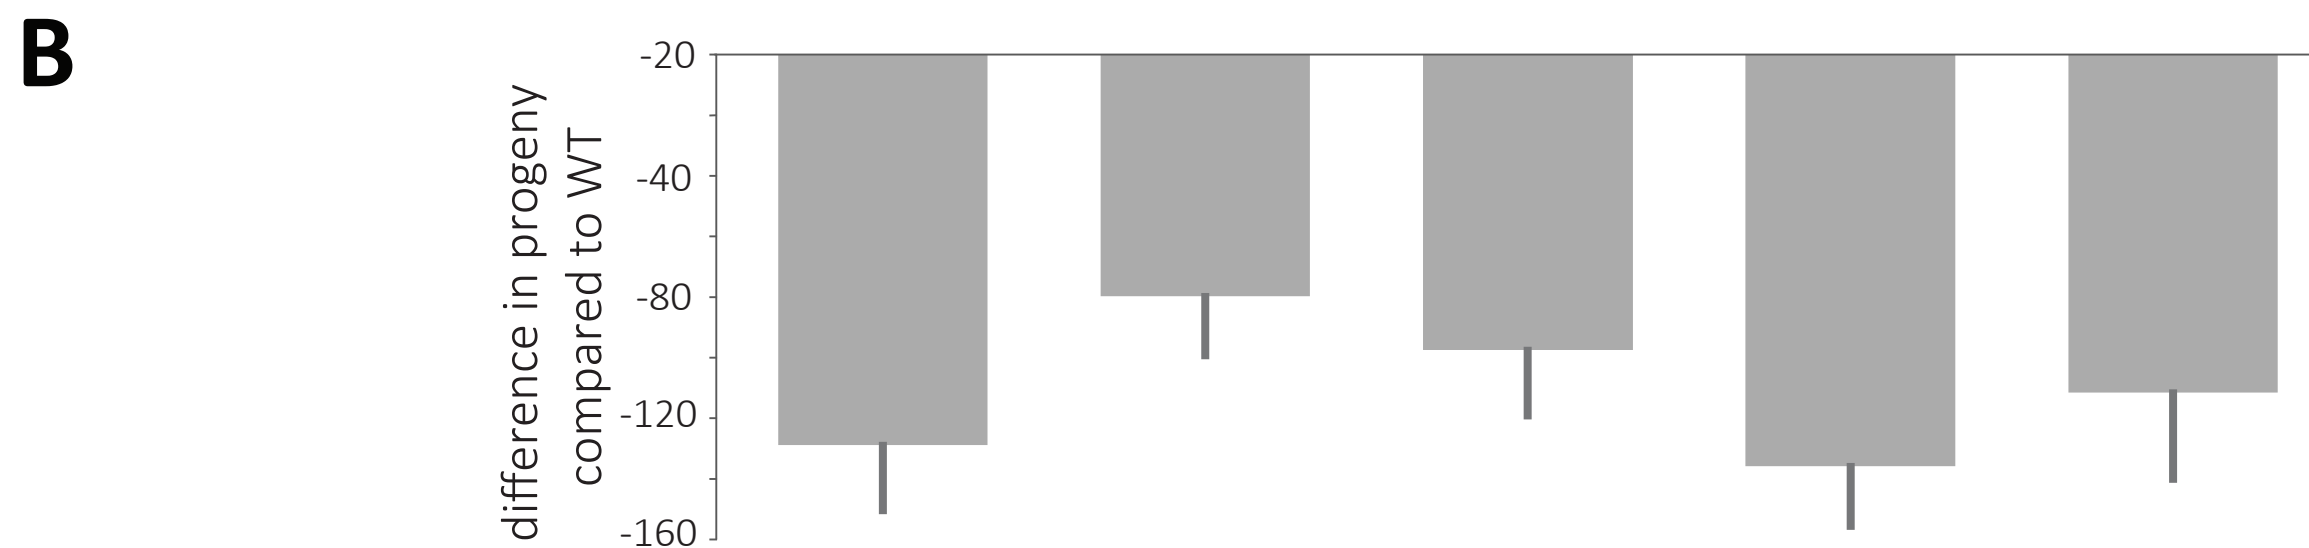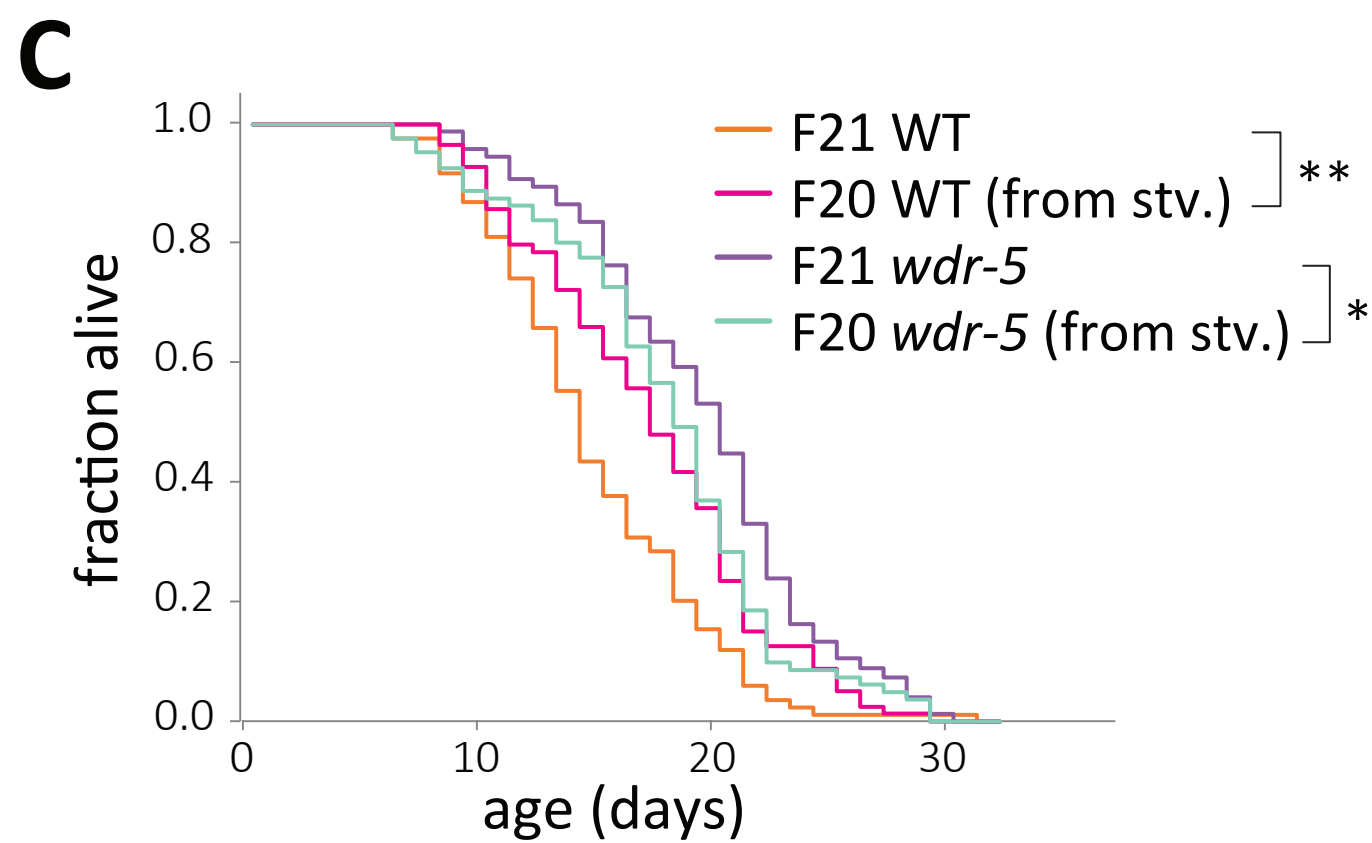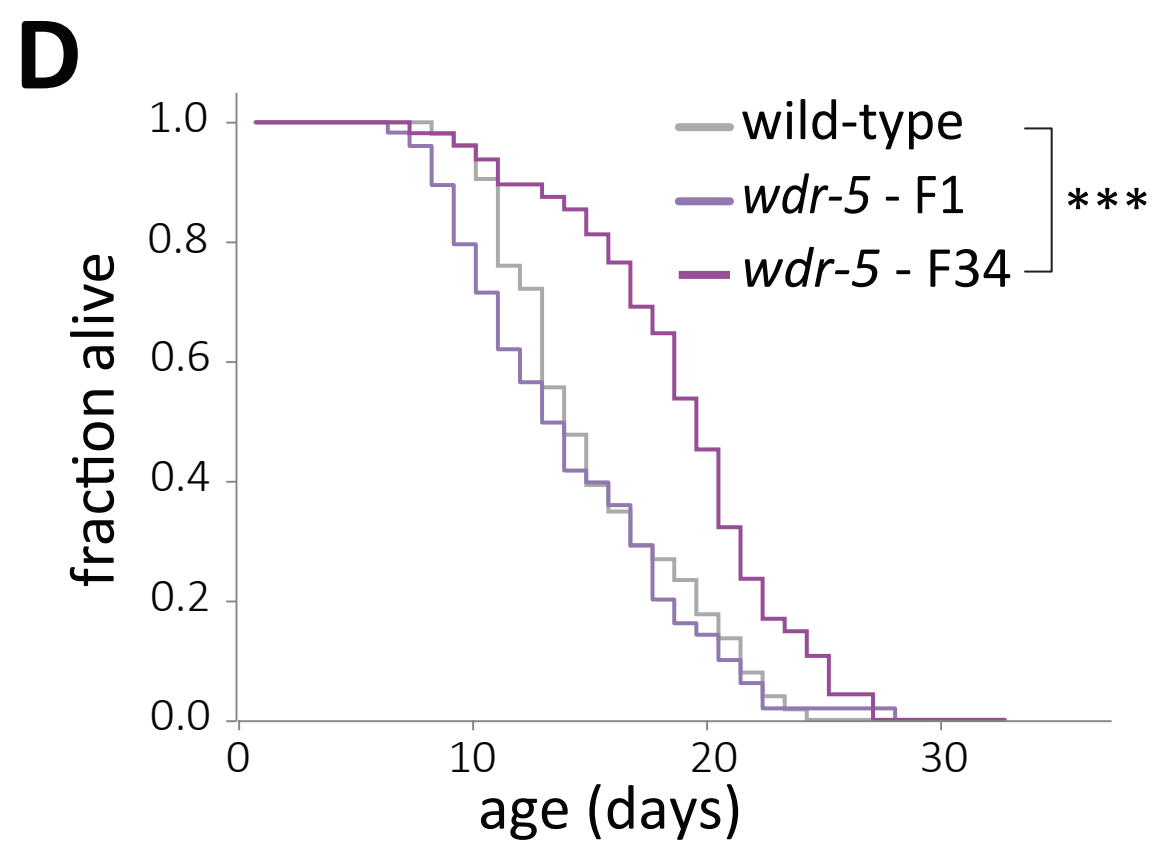

Supplement: supp [file elife-48498-supp-v1.zip › elife_poa_e48498_Figure_1_figure_supplement_2.pdf]
